# Supplementary material for: Transcriptome Dysregulation in Hepatoblastoma: The Pivotal Role of Noncoding Rnas and Changes in Lipid Metabolism
Source: Research Square preprint supplement (doi:10.21203/rs.3.rs-1538524/v1), 2022-04-19
Supplement: Supplementary file 1 [file b2194098d22413829b09e471.xlsx]

## Sheet: Supplementary Table S1
Supplementary Table S1. List of the 1492 differentially expressed genes in HBLs and their respective log2 fold-change and padj.
Gene	GeneName	log2 fold-change	padj
ENSG00000272344	SNORD114-21	5.68209	1.42974e-05
ENSG00000227619	RP11-492E3.2	5.65276	0.00143646
ENSG00000165078	CPA6	5.02375	1.13713e-05
ENSG00000201672	SNORD113-4	5.00945	0.00128752
ENSG00000213981	AC007277.3	5.00688	0.00128752
ENSG00000145721	LIX1	4.93928	1.57477e-05
ENSG00000174498	IGDCC3	4.92772	3.2565e-06
ENSG00000202048	SNORD114-20	4.85638	8.42638e-06
ENSG00000107984	DKK1	4.81301	3.2565e-06
ENSG00000272796	RP1-74M1.3	4.78529	6.47961e-05
ENSG00000062038	CDH3	4.56155	0.00434323
ENSG00000152931	PART1	4.54726	0.00904793
ENSG00000104371	DKK4	4.42393	0.000100471
ENSG00000250033	SLC7A11-AS1	4.38924	0.000160135
ENSG00000201247	SNORD114-13	4.38197	0.000208928
ENSG00000238178	RP11-431J24.2	4.3682	0.000256996
ENSG00000144354	CDCA7	4.35896	0.00399912
ENSG00000154545	MAGED4	4.34109	0.000270014
ENSG00000149948	HMGA2	4.33977	4.33667e-05
ENSG00000168243	GNG4	4.30793	3.95464e-05
ENSG00000233154	RP4-655J12.4	4.28968	0.0001547
ENSG00000261685	RP11-401P9.4	4.25493	7.67916e-06
ENSG00000171864	PRND	4.18681	0.000328201
ENSG00000200832	SNORD114-4	4.17078	0.000531715
ENSG00000199914	SNORD114-16	4.16735	0.000592038
ENSG00000166450	PRTG	4.13637	6.86562e-05
ENSG00000202191	SNORD113-1	4.1357	0.000260276
ENSG00000229567	RP4-717I23.2	4.13495	0.000459586
ENSG00000252009	SNORD112	4.12842	0.000723825
ENSG00000163751	CPA3	4.1078	4.52955e-05
ENSG00000151012	SLC7A11	4.08949	0.0018508
ENSG00000260230	FRRS1L	4.08264	0.000130126
ENSG00000144406	UNC80	4.05636	0.00688945
ENSG00000109205	ODAM	4.04477	5.8178e-05
ENSG00000081051	AFP	4.02207	0.00813265
ENSG00000171004	HS6ST2	4.01181	0.0116794
ENSG00000100593	ISM2	4.00678	8.7953e-05
ENSG00000165685	TMEM52B	3.98416	0.00813972
ENSG00000131969	ABHD12B	3.97369	0.000229692
ENSG00000179546	HTR1D	3.97045	0.000303373
ENSG00000092009	CMA1	3.9656	0.00127848
ENSG00000078579	FGF20	3.95682	0.00161621
ENSG00000163132	MSX1	3.95111	0.0328151
ENSG00000242060	RPS3AP49	3.94392	0.00111758
ENSG00000141314	RHBDL3	3.9158	0.000328201
ENSG00000260585	RP13-192B19.2	3.90891	0.00210008
ENSG00000185002	RFX6	3.90059	0.00138009
ENSG00000227906	SNAP25-AS1	3.89157	0.000263375
ENSG00000260025	RP11-490M8.1	3.88662	0.00127848
ENSG00000015413	DPEP1	3.88154	0.000462979
ENSG00000021645	NRXN3	3.87904	2.72433e-05
ENSG00000170374	SP7	3.86755	0.0303832
ENSG00000228623	ZNF883	3.86102	0.000486356
ENSG00000214389	RPS3AP26	3.85958	0.0442628
ENSG00000243071	RP11-613M5.2	3.85427	0.000940723
ENSG00000155511	GRIA1	3.84047	0.00123507
ENSG00000241464	RPL39P38	3.83969	0.00262724
ENSG00000018625	ATP1A2	3.8364	0.00512122
ENSG00000124205	EDN3	3.82487	0.0179989
ENSG00000127863	TNFRSF19	3.82414	2.72433e-05
ENSG00000213757	CTC-451P13.1	3.80795	0.00919589
ENSG00000155966	AFF2	3.79356	0.0176068
ENSG00000203397	RP13-36G14.3	3.78853	0.000940723
ENSG00000225746	AL132709.5	3.78431	0.00622641
ENSG00000189120	SP6	3.78039	0.0186176
ENSG00000232560	C21orf37	3.77762	0.00315245
ENSG00000260641	RP11-1299A16.3	3.77662	0.00238578
ENSG00000163288	GABRB1	3.77548	0.0285843
ENSG00000180730	SHISA2	3.77206	0.0453823
ENSG00000120149	MSX2	3.76093	0.0275661
ENSG00000265250	AL132709.3	3.75164	0.00286218
ENSG00000178429	RPS3AP5	3.75036	0.032338
ENSG00000201700	SNORD113-3	3.74872	0.000516947
ENSG00000139055	ERP27	3.73674	0.000160135
ENSG00000261379	RP11-395N3.1	3.7317	0.00313985
ENSG00000231764	DLX6-AS1	3.73167	0.00056792
ENSG00000231185	AC005592.2	3.72052	0.00313985
ENSG00000229133	RPS7P4	3.69862	0.0363002
ENSG00000172986	GXYLT2	3.69042	2.72433e-05
ENSG00000272474	SNORD113-5	3.687	0.00355187
ENSG00000162814	SPATA17	3.68609	0.00430275
ENSG00000200215	SNORD113-6	3.67648	0.0035709
ENSG00000201710	SNORD113	3.67428	0.00313985
ENSG00000112782	CLIC5	3.66964	0.0391346
ENSG00000129654	FOXJ1	3.66949	0.00400553
ENSG00000214039	RP11-474D1.3	3.66298	0.000996057
ENSG00000006377	DLX6	3.64762	0.00411989
ENSG00000199005	MIR370	3.64645	0.00289341
ENSG00000248870	CTD-2015A6.2	3.63665	0.00411989
ENSG00000187730	GABRD	3.6304	0.00926313
ENSG00000182389	CACNB4	3.63009	0.000367742
ENSG00000258545	RP4-755D9.1	3.62891	0.00315245
ENSG00000137868	STRA6	3.62373	0.0139869
ENSG00000233254	RPL21P134	3.60922	0.00366226
ENSG00000157445	CACNA2D3	3.60588	0.014052
ENSG00000206557	TRIM71	3.59705	0.00127195
ENSG00000139219	COL2A1	3.59497	0.00137924
ENSG00000183888	C1orf64	3.59389	0.00236329
ENSG00000166448	TMEM130	3.58623	0.023113
ENSG00000233766	AC098617.1	3.58248	0.000703295
ENSG00000144339	TMEFF2	3.57398	0.00495325
ENSG00000121742	GJB6	3.57134	0.00243745
ENSG00000201569	SNORD114-17	3.566	0.00323011
ENSG00000261083	RP11-93I21.3	3.55946	0.00259676
ENSG00000183036	PCP4	3.55752	0.000723825
ENSG00000252144	SNORD112	3.55384	0.0054575
ENSG00000114948	ADAM23	3.55343	0.000481623
ENSG00000215957	MIR300	3.55066	0.0039703
ENSG00000224041	IGKV3D-15	3.54094	0.0159165
ENSG00000254759	NAP1L1P1	3.53874	0.000964821
ENSG00000176678	FOXL1	3.53845	0.00315245
ENSG00000158560	DYNC1I1	3.53679	0.000314232
ENSG00000140807	NKD1	3.52635	8.7953e-05
ENSG00000260400	RP11-119F7.5	3.52372	0.000927099
ENSG00000267731	RP11-147L13.8	3.51094	0.00792691
ENSG00000151917	BEND6	3.50237	0.00619423
ENSG00000267370	CTD-2623N2.3	3.50191	0.000160135
ENSG00000199798	SNORD114-5	3.50164	0.0061857
ENSG00000106852	LHX6	3.49904	0.00233659
ENSG00000264109	MIR4712	3.49366	0.00554331
ENSG00000151789	ZNF385D	3.49254	0.00384318
ENSG00000266045	RP11-466P24.7	3.48759	0.0348789
ENSG00000178723	GLULP4	3.48531	0.0026392
ENSG00000227309	AC140076.1	3.48512	0.00238253
ENSG00000232021	LEF1-AS1	3.48024	0.00668803
ENSG00000194717	MIR494	3.4689	0.00647755
ENSG00000154856	APCDD1	3.46283	0.00104344
ENSG00000159708	LRRC36	3.45263	0.00637598
ENSG00000133878	DUSP26	3.45103	0.0026392
ENSG00000242276	RPL5P3	3.44966	0.00351747
ENSG00000207934	MIR654	3.44813	0.00762403
ENSG00000233926	RP11-154D17.1	3.44655	0.00637598
ENSG00000126010	GRPR	3.44383	0.00508501
ENSG00000198822	GRM3	3.4431	0.0321015
ENSG00000173947	PIFO	3.44239	0.00637598
ENSG00000254170	CTD-2073O6.1	3.44223	0.00705973
ENSG00000164932	CTHRC1	3.44176	0.00666316
ENSG00000199390	SNORD114-7	3.44047	0.00756397
ENSG00000147614	ATP6V0D2	3.43628	0.00736591
ENSG00000230580	AC021016.7	3.43411	0.00702133
ENSG00000258553	RP11-16B13.1	3.42677	0.00747266
ENSG00000075340	ADD2	3.42233	0.0458108
ENSG00000226525	RPS7P10	3.41997	0.0486857
ENSG00000233837	EIF3LP2	3.41632	0.0051077
ENSG00000134057	CCNB1	3.41123	0.0437742
ENSG00000205871	RPS3AP47	3.4109	0.00238253
ENSG00000226410	AC104058.1	3.4034	0.00453297
ENSG00000117586	TNFSF4	3.40171	0.00666316
ENSG00000120457	KCNJ5	3.39857	0.000592038
ENSG00000244538	RP11-10G12.1	3.39821	0.00806474
ENSG00000225649	AC064875.2	3.39802	0.00799716
ENSG00000211448	DIO2	3.39232	0.0102344
ENSG00000083720	OXCT1	3.38919	3.1098e-05
ENSG00000168078	PBK	3.38599	0.0417726
ENSG00000086159	AQP6	3.38029	0.00295741
ENSG00000181562	EDDM3A	3.37981	0.0201671
ENSG00000254126	CD8BP	3.36887	0.0110081
ENSG00000158427	TMSB15B	3.34332	0.00487084
ENSG00000202142	SNORD114-18	3.34169	0.00603676
ENSG00000168785	TSPAN5	3.34034	0.000183617
ENSG00000240231	RPS27P29	3.33656	0.0102458
ENSG00000227252	AC105760.2	3.33459	0.00368359
ENSG00000130876	SLC7A10	3.33183	0.00324253
ENSG00000212384	SNORD113-2	3.32665	0.00353877
ENSG00000112280	COL9A1	3.32007	0.0117507
ENSG00000123201	GUCY1B2	3.31666	0.00816873
ENSG00000168065	SLC22A11	3.31305	0.00399912
ENSG00000188803	SHISA6	3.31295	0.00654433
ENSG00000174460	ZCCHC12	3.31068	0.0125083
ENSG00000250966	RP11-402J6.3	3.30915	0.0102458
ENSG00000187243	MAGED4B	3.309	0.00880414
ENSG00000253161	RP11-150O12.1	3.30743	0.00997903
ENSG00000249464	LINC01091	3.30176	9.74288e-05
ENSG00000108244	KRT23	3.29376	0.00408997
ENSG00000207587	MIR544A	3.29344	0.00880414
ENSG00000013293	SLC7A14	3.293	0.0114724
ENSG00000261589	CTC-462L7.1	3.2925	3.2565e-06
ENSG00000199942	SNORD114-19	3.28216	0.0110355
ENSG00000273343	XXbac-B444P24.13	3.28064	0.00785004
ENSG00000173253	DMRT2	3.27922	0.00434323
ENSG00000178882	FAM101A	3.27713	0.00883392
ENSG00000156076	WIF1	3.27591	0.00399912
ENSG00000124835	AC105760.3	3.27501	0.0122789
ENSG00000243388	RPL3P3	3.27247	0.0114724
ENSG00000058335	RASGRF1	3.27237	0.00622641
ENSG00000232116	RP11-187C18.2	3.2704	0.0104494
ENSG00000241061	RPL5P1	3.26934	0.0026392
ENSG00000261019	RP11-111K18.2	3.2685	0.00967529
ENSG00000102678	FGF9	3.26561	0.0116794
ENSG00000263427	RP11-599B13.3	3.25784	0.0082968
ENSG00000271327	RP11-1109F11.3	3.25377	0.00232608
ENSG00000264705	RP11-674P19.2	3.24761	0.0130011
ENSG00000215003	RPL15P20	3.24501	0.012982
ENSG00000112818	MEP1A	3.24158	0.00253967
ENSG00000121318	TAS2R10	3.2257	0.0115404
ENSG00000147402	GABRQ	3.22167	0.0159622
ENSG00000114279	FGF12	3.21475	0.00238253
ENSG00000213363	RPS3P6	3.21239	0.013092
ENSG00000049192	ADAMTS6	3.20086	0.000373415
ENSG00000181626	ANKRD62	3.19493	0.0140806
ENSG00000268688	AC007382.1	3.19474	0.0105181
ENSG00000120498	TEX11	3.1943	0.00890069
ENSG00000200823	SNORD114-2	3.19345	0.00781036
ENSG00000251276	MAGI2-AS1	3.19327	0.0110355
ENSG00000157680	DGKI	3.19205	0.00393832
ENSG00000198807	PAX9	3.18982	0.0139708
ENSG00000248773	RP11-231L11.3	3.18857	0.0082968
ENSG00000117501	MROH9	3.1879	0.0154857
ENSG00000144355	DLX1	3.17692	0.00490405
ENSG00000243961	RP5-839B4.8	3.17568	0.012707
ENSG00000177181	RIMKLA	3.17226	0.00418534
ENSG00000114113	RBP2	3.16974	0.0039598
ENSG00000227835	CARM1P1	3.16459	0.00550255
ENSG00000254695	RP11-396O20.1	3.16446	0.0154202
ENSG00000117122	MFAP2	3.16303	0.00352498
ENSG00000234295	AC109135.1	3.15339	0.0137336
ENSG00000083067	TRPM3	3.1517	0.000895207
ENSG00000182601	HS3ST4	3.1506	0.0357202
ENSG00000172399	MYOZ2	3.14475	0.0176068
ENSG00000173391	OLR1	3.14318	0.00876714
ENSG00000273301	RP11-314B1.2	3.1377	0.0136531
ENSG00000242208	RPL5P29	3.13624	0.0116248
ENSG00000145244	CORIN	3.13354	0.00643005
ENSG00000230076	AC016708.2	3.13061	0.0118584
ENSG00000184156	KCNQ3	3.123	0.0180444
ENSG00000225715	RP11-325E14.5	3.11985	0.00353877
ENSG00000251815	SNORD116-26	3.11786	0.0159165
ENSG00000227236	RP11-365D9.1	3.11608	0.0183166
ENSG00000207762	MIR329-2	3.11557	0.0189198
ENSG00000260029	RP11-401P9.1	3.11156	0.00237539
ENSG00000152578	GRIA4	3.11125	0.0177474
ENSG00000147655	RSPO2	3.10814	0.00786255
ENSG00000130540	SULT4A1	3.10594	0.0110325
ENSG00000204381	LAYN	3.09871	0.0486857
ENSG00000222185	SNORD113	3.09751	0.0118584
ENSG00000214541	RPS4XP3	3.09316	0.012591
ENSG00000251892	RNU7-84P	3.09257	0.0190769
ENSG00000240395	RPL5P23	3.08577	0.00128421
ENSG00000213399	AC022210.2	3.08557	0.0159622
ENSG00000223890	AC008171.1	3.08092	0.0120552
ENSG00000250530	RP11-436H11.3	3.07845	0.0177168
ENSG00000219274	RPS20P2	3.0728	0.0197779
ENSG00000232833	FAM27E3	3.07254	0.0110355
ENSG00000250144	RP11-553P9.1	3.06667	0.012591
ENSG00000211978	IGHV5-78	3.06632	0.0234303
ENSG00000144278	GALNT13	3.06601	0.00792325
ENSG00000112655	PTK7	3.06427	5.59487e-05
ENSG00000251523	RP11-724M22.1	3.05645	0.0193318
ENSG00000183844	FAM3B	3.04792	0.0109842
ENSG00000248774	RP11-798M19.3	3.04652	0.0214724
ENSG00000088882	CPXM1	3.0456	0.00498448
ENSG00000114805	PLCH1	3.04269	0.0109842
ENSG00000179136	LINC00670	3.04232	0.022954
ENSG00000253414	RP11-150O12.6	3.03783	0.0210658
ENSG00000171495	MROH2B	3.03704	0.0213732
ENSG00000206688	SNORD116-18	3.03438	0.00411989
ENSG00000230255	RP11-423O2.1	3.03234	0.0170716
ENSG00000143320	CRABP2	3.02856	0.00968435
ENSG00000101198	NKAIN4	3.02809	0.0201671
ENSG00000138738	PRDM5	3.02439	0.0397529
ENSG00000188873	RPL10AP2	3.02295	0.0064993
ENSG00000159247	TUBBP5	3.0229	0.00315245
ENSG00000261211	RP1-80N2.3	3.02106	0.0110355
ENSG00000086991	NOX4	3.02105	0.00253967
ENSG00000101311	FERMT1	3.01945	0.000723825
ENSG00000200279	SNORD114-10	3.01748	0.00806474
ENSG00000202058	RN7SKP80	3.01505	0.0102877
ENSG00000271417	RP11-909M7.3	3.0133	0.00145823
ENSG00000188856	RPSAP47	3.00747	0.0243227
ENSG00000199109	MIR411	3.00642	0.0243227
ENSG00000225170	RP5-828K20.1	3.00631	0.0246677
ENSG00000082497	SERTAD4	3.00362	0.024082
ENSG00000264514	RP11-720L2.4	2.99935	0.0233888
ENSG00000229605	RP11-492M23.2	2.99818	0.0285843
ENSG00000197465	GYPE	2.99797	0.00762403
ENSG00000147262	GPR119	2.99613	0.0267286
ENSG00000273355	RP11-672L10.6	2.99404	0.01743
ENSG00000213371	NAP1L1P3	2.99382	0.0147553
ENSG00000105997	HOXA3	2.99267	0.00118159
ENSG00000250182	EEF1A1P13	2.98996	0.00418534
ENSG00000224839	AC093698.2	2.98719	0.0311039
ENSG00000132932	ATP8A2	2.98653	0.0319574
ENSG00000136943	CTSV	2.98378	0.0201671
ENSG00000231855	GLUDP5	2.98327	0.0240696
ENSG00000213621	RPSAP54	2.98039	0.00804509
ENSG00000163536	SERPINI1	2.9781	0.00326814
ENSG00000270028	RP11-380L11.4	2.96941	0.019577
ENSG00000251769	SNORD112	2.96619	0.00806335
ENSG00000179542	SLITRK4	2.96255	0.0219724
ENSG00000017483	SLC38A5	2.96157	0.000633928
ENSG00000137270	GCM1	2.96133	0.0279489
ENSG00000230979	AC079250.1	2.96036	0.00639781
ENSG00000251550	RP11-501C14.7	2.96021	0.0259886
ENSG00000232977	LINC00327	2.95971	0.0244763
ENSG00000244073	RPS4XP6	2.95894	0.00138009
ENSG00000008277	ADAM22	2.95838	0.00619423
ENSG00000267325	RP11-397A16.2	2.95801	0.0214724
ENSG00000250986	AC141928.1	2.95608	0.0226362
ENSG00000153237	CCDC148	2.95543	0.00710403
ENSG00000237676	RPL30P4	2.95528	0.0297105
ENSG00000213433	RP11-54C4.1	2.95515	0.02946
ENSG00000260086	RP11-42I10.1	2.95393	0.0261706
ENSG00000197047	Z73979.1	2.95392	0.0311039
ENSG00000169877	AHSP	2.95309	0.0147116
ENSG00000250979	RP11-656G20.1	2.94817	0.0240725
ENSG00000248125	CTB-73N10.1	2.9472	0.0285843
ENSG00000170891	CYTL1	2.94683	0.0316807
ENSG00000237749	RP3-423B22.5	2.94672	0.0250896
ENSG00000223529	EEF1A1P8	2.94557	0.00883392
ENSG00000257277	RP11-434H14.1	2.94468	0.0213732
ENSG00000214917	RP11-53I6.1	2.94413	0.0272726
ENSG00000139971	C14orf37	2.94072	0.00428567
ENSG00000270010	CTD-2132N18.4	2.94058	0.0240725
ENSG00000168671	UGT3A2	2.93865	0.00842939
ENSG00000075891	PAX2	2.93816	0.0244332
ENSG00000186197	EDARADD	2.93674	0.00473509
ENSG00000166963	MAP1A	2.93413	0.0118584
ENSG00000261024	GS1-279B7.1	2.93105	0.0226362
ENSG00000236511	RP11-32F11.2	2.93012	0.023948
ENSG00000255414	LINC01059	2.92939	0.036155
ENSG00000180815	MAP3K15	2.92807	0.0254429
ENSG00000208004	MIR323B	2.92659	0.0201663
ENSG00000211574	MIR770	2.92606	0.0190854
ENSG00000149534	MS4A2	2.92551	0.0299237
ENSG00000177508	IRX3	2.92497	0.0230164
ENSG00000217130	RP3-375P9.2	2.92497	0.00688945
ENSG00000259763	RP11-327J17.1	2.92431	0.0255928
ENSG00000232176	RP11-146N23.1	2.92372	0.00688945
ENSG00000236494	RP11-89N17.4	2.92236	0.0039703
ENSG00000216179	MIR541	2.9197	0.0267569
ENSG00000137869	CYP19A1	2.91921	0.0208529
ENSG00000082196	C1QTNF3	2.91708	0.00192072
ENSG00000239377	RP4-584D14.6	2.91653	0.0170716
ENSG00000100625	SIX4	2.91416	0.000252637
ENSG00000100095	SEZ6L	2.91405	0.0176068
ENSG00000235890	TSPEAR-AS1	2.91246	0.0274488
ENSG00000226786	RP1-167F1.2	2.9122	0.0342256
ENSG00000257890	RP11-114F10.2	2.90825	0.0173405
ENSG00000244681	MTHFD2P1	2.90699	0.0253047
ENSG00000139292	LGR5	2.90607	0.00721038
ENSG00000203414	BTBD7P1	2.9016	0.0214724
ENSG00000112837	TBX18	2.8989	0.0377473
ENSG00000256553	TRAV1-2	2.89528	0.0319613
ENSG00000164171	ITGA2	2.89399	0.000256996
ENSG00000229237	HMGN1P37	2.89152	0.0362078
ENSG00000216099	MIR889	2.88703	0.0329508
ENSG00000258613	RPL21P7	2.88672	0.0365934
ENSG00000242692	RPS27AP1	2.88583	0.0317066
ENSG00000246448	RP13-578N3.3	2.88493	0.0240725
ENSG00000138400	MDH1B	2.88158	0.0257035
ENSG00000111728	ST8SIA1	2.8743	0.00950145
ENSG00000258178	RP11-18J9.3	2.87336	0.0322549
ENSG00000172016	REG3A	2.87318	0.000208928
ENSG00000260804	RP11-566E18.3	2.87283	3.1098e-05
ENSG00000249853	HS3ST5	2.87232	0.00876714
ENSG00000199020	MIR381	2.87172	0.0338603
ENSG00000185523	C1orf227	2.87001	0.0318871
ENSG00000185818	NAT8L	2.86996	0.0176782
ENSG00000251388	RP11-427M20.1	2.86783	0.0327308
ENSG00000169306	IL1RAPL1	2.86614	0.0205332
ENSG00000229184	RP11-255J3.3	2.86427	0.0362621
ENSG00000242242	PVRL3-AS1	2.86292	0.0309875
ENSG00000079101	CLUL1	2.86152	0.0279489
ENSG00000118402	ELOVL4	2.86061	0.0155196
ENSG00000259658	RP11-89K11.1	2.86049	0.0179883
ENSG00000120324	PCDHB10	2.85912	0.0230226
ENSG00000162373	BEND5	2.85607	0.00571599
ENSG00000234338	RP11-797H7.1	2.85588	0.0114044
ENSG00000089199	CHGB	2.85414	0.0239238
ENSG00000165816	VWA2	2.85142	0.0240968
ENSG00000230364	RPL4P3	2.85051	0.0379936
ENSG00000066032	CTNNA2	2.85026	0.0214724
ENSG00000224971	SUMO2P3	2.8471	0.023978
ENSG00000268222	EEF1A1P7	2.84606	0.00979373
ENSG00000228568	AC006461.2	2.84436	0.0306825
ENSG00000213950	RPS10P2	2.84426	0.0194308
ENSG00000175832	ETV4	2.84274	0.00742576
ENSG00000254233	RP11-242J7.1	2.84219	0.0259886
ENSG00000245205	EEF1A1P4	2.83811	0.00627489
ENSG00000207749	MIR299	2.83418	0.0368389
ENSG00000200406	SNORD114-23	2.83403	0.0137159
ENSG00000224004	ATP5C1P1	2.83318	0.0331016
ENSG00000265936	RP11-563H6.1	2.83281	0.043349
ENSG00000136110	LECT1	2.83054	0.0365934
ENSG00000228038	VN1R51P	2.82743	0.0365934
ENSG00000167971	CASKIN1	2.82606	0.0160327
ENSG00000270164	AC006129.4	2.82349	0.0418779
ENSG00000233870	AC007881.4	2.82225	0.0419603
ENSG00000243904	RP11-600F24.1	2.81825	0.0437742
ENSG00000259134	LINC00924	2.8157	0.00956739
ENSG00000147180	ZNF711	2.81568	0.000940723
ENSG00000253204	RP5-1009N12.1	2.81545	0.0258164
ENSG00000235527	RP5-1073O3.7	2.81505	0.0376685
ENSG00000133169	BEX1	2.81444	0.0172875
ENSG00000130055	GDPD2	2.81431	0.0321774
ENSG00000172020	GAP43	2.81332	0.0145916
ENSG00000247228	RP11-296I10.3	2.81304	6.86562e-05
ENSG00000271109	CTC-523E23.11	2.81275	0.0374183
ENSG00000221077	AL117190.1	2.81214	0.0421653
ENSG00000249363	CTB-78O21.1	2.81185	0.0210266
ENSG00000200926	RNU6-960P	2.81027	0.0392805
ENSG00000183941	HIST2H4A	2.81016	0.021451
ENSG00000241556	RP11-490G8.1	2.80809	0.0214724
ENSG00000201600	RN7SKP124	2.80591	0.0296533
ENSG00000225930	AC026150.5	2.80216	0.0374367
ENSG00000101951	PAGE4	2.80185	0.0371089
ENSG00000226797	AC015923.1	2.80167	0.0412572
ENSG00000141150	RASL10B	2.80138	0.00478681
ENSG00000232018	AL132709.8	2.80115	0.00160401
ENSG00000257040	AC005477.1	2.7963	0.0405219
ENSG00000162409	PRKAA2	2.79548	0.000580313
ENSG00000232385	RPS3AP25	2.79546	0.0326006
ENSG00000256025	CACNA1C-AS4	2.79543	0.023088
ENSG00000225511	LINC00475	2.79435	0.0372627
ENSG00000124813	RUNX2	2.79345	0.00757605
ENSG00000230024	RP11-95P13.1	2.79274	0.0355609
ENSG00000226442	AC006037.2	2.79253	0.0318259
ENSG00000200367	SNORD113-8	2.79113	0.0319613
ENSG00000260455	CASC14	2.78942	0.0448843
ENSG00000231414	AC016700.6	2.78888	0.0332423
ENSG00000268894	PLCE1-AS1	2.78849	0.0412933
ENSG00000147481	SNTG1	2.78844	0.0230164
ENSG00000091972	CD200	2.78546	0.00728216
ENSG00000207460	SNORD116-19	2.78331	0.0062867
ENSG00000270172	RP5-1024G6.8	2.78293	0.037804
ENSG00000235776	AC000089.3	2.78131	0.00351747
ENSG00000249489	GAPDHP70	2.7792	0.0223978
ENSG00000261557	EEF1A1P38	2.77868	0.0246309
ENSG00000113296	THBS4	2.77521	0.0127288
ENSG00000196381	ZNF781	2.77087	0.00688945
ENSG00000249264	EEF1A1P9	2.77077	0.0104747
ENSG00000258637	RP11-242P2.1	2.76922	0.041673
ENSG00000272070	AC005618.6	2.76806	0.0142845
ENSG00000257674	RP11-76E16.2	2.76705	0.0406405
ENSG00000271966	RP11-7F18.2	2.7661	0.0327308
ENSG00000228071	RPL7P47	2.76583	0.0417204
ENSG00000270001	RP11-218C14.8	2.76471	0.0357202
ENSG00000234964	FABP5P7	2.76358	0.0368389
ENSG00000225680	AL163953.2	2.76116	0.0244332
ENSG00000183558	HIST2H2AA3	2.75923	0.0247135
ENSG00000248187	RP11-184M15.1	2.75805	0.0437742
ENSG00000271659	RP11-435O5.4	2.75789	0.0404493
ENSG00000217227	RP1-319M7.2	2.75776	0.0418593
ENSG00000203867	RBM20	2.75674	0.0183746
ENSG00000125046	SSUH2	2.75653	0.0165432
ENSG00000165309	ARMC3	2.75563	0.0423393
ENSG00000198477	ZNF280B	2.75535	0.00382072
ENSG00000211582	MIR758	2.75439	0.0423393
ENSG00000128683	GAD1	2.75347	0.0327308
ENSG00000228502	EEF1A1P11	2.75279	0.0127288
ENSG00000207949	MIR214	2.7527	0.0406405
ENSG00000196859	KRT39	2.75209	0.0418593
ENSG00000182013	PNMAL1	2.75186	0.0137662
ENSG00000225918	RPL7P59	2.75005	0.0486857
ENSG00000250361	GYPB	2.74457	0.0445923
ENSG00000258768	CTD-2292M16.8	2.74243	0.0010789
ENSG00000231702	RP11-54O7.10	2.74204	0.0370515
ENSG00000232718	GAPDHP48	2.74108	0.0236995
ENSG00000197479	PCDHB11	2.74107	0.0195169
ENSG00000113205	PCDHB3	2.73785	0.0491633
ENSG00000202358	RNU6-652P	2.73772	0.0363923
ENSG00000214062	RPL7P17	2.73509	0.0342249
ENSG00000117600	LPPR4	2.73397	0.0342249
ENSG00000227170	AF178030.2	2.73394	0.0378771
ENSG00000200480	SNORD114-28	2.73352	0.0336917
ENSG00000201899	SNORD114-24	2.7328	0.0405219
ENSG00000213087	RP11-613F7.1	2.73091	0.0269601
ENSG00000135119	RNFT2	2.73056	0.0063476
ENSG00000177699	RP11-16K12.1	2.72985	0.0436866
ENSG00000231848	AC012354.8	2.72455	0.0333521
ENSG00000187772	LIN28B	2.72335	0.00162768
ENSG00000134028	ADAMDEC1	2.72289	0.0200947
ENSG00000139200	PIANP	2.72143	0.0389709
ENSG00000268166	CTC-471F3.6	2.72012	0.0329508
ENSG00000232745	ANKRD20A14P	2.71971	0.0417204
ENSG00000112852	PCDHB2	2.71863	0.0427577
ENSG00000270115	RP11-415J8.7	2.71851	0.0141371
ENSG00000213759	UGT2B11	2.7181	0.0272726
ENSG00000225356	RP11-433O3.1	2.71353	0.048123
ENSG00000234816	U91328.2	2.71216	0.0417853
ENSG00000270021	CTC-203F4.2	2.71043	0.0469223
ENSG00000260887	RP11-142G1.2	2.71034	0.0432748
ENSG00000168743	NPNT	2.70935	0.000642558
ENSG00000226149	RP1-69D17.4	2.70773	0.0307275
ENSG00000142621	FHAD1	2.70583	0.0219242
ENSG00000162738	VANGL2	2.70517	0.00756397
ENSG00000104177	MYEF2	2.70509	0.00463123
ENSG00000186047	DLEU7	2.70497	0.0213732
ENSG00000270557	RP11-546J1.1	2.70326	0.0272269
ENSG00000228624	RP3-399L15.3	2.70143	0.0188327
ENSG00000213750	KB-1683C8.1	2.70126	0.0489408
ENSG00000224856	RP4-796I17.5	2.69899	0.0457371
ENSG00000197891	SLC22A12	2.69883	0.0170716
ENSG00000211588	AL023913.1	2.69834	0.0486857
ENSG00000257835	RP1-97G4.1	2.69826	0.0486857
ENSG00000203286	AL365202.1	2.69826	0.0177168
ENSG00000173077	DEC1	2.69682	0.0437742
ENSG00000203811	HIST2H3C	2.69396	0.0296533
ENSG00000248309	MEF2C-AS1	2.69098	0.0111016
ENSG00000243819	RN7SL832P	2.69044	0.0366275
ENSG00000247708	STX18-AS1	2.68882	0.00799716
ENSG00000185480	PARPBP	2.68874	0.0117507
ENSG00000196167	COLCA1	2.68812	0.00775478
ENSG00000214244	SETP21	2.68722	0.0463022
ENSG00000202270	SNORD114-12	2.68681	0.0284804
ENSG00000255319	ENPP7P8	2.68582	0.0457371
ENSG00000090382	LYZ	2.68292	0.0374183
ENSG00000225912	RP13-258O15.1	2.68221	0.0212977
ENSG00000204010	IFIT1B	2.67888	0.0342249
ENSG00000258357	RP11-778J16.2	2.67847	0.0486229
ENSG00000123119	NECAB1	2.67475	0.0147553
ENSG00000151572	ANO4	2.67417	0.0363923
ENSG00000087250	MT3	2.67068	0.0432748
ENSG00000248307	LINC00616	2.67031	0.00207889
ENSG00000266783	RP11-715F3.2	2.66973	0.0432748
ENSG00000197705	KLHL14	2.66957	0.0424296
ENSG00000152661	GJA1	2.66922	0.00411989
ENSG00000120322	PCDHB8	2.66866	0.0480266
ENSG00000159164	SV2A	2.66763	0.0158363
ENSG00000213609	RP11-170M17.2	2.66754	0.000889172
ENSG00000138395	CDK15	2.66713	0.0495692
ENSG00000226855	RP11-350G8.3	2.66648	0.048123
ENSG00000227077	AC107983.4	2.66612	0.0311039
ENSG00000248222	CTB-174D11.1	2.66607	0.032632
ENSG00000258744	RP11-80A15.1	2.65923	0.0244526
ENSG00000248763	RP13-644M16.5	2.65907	0.0353552
ENSG00000103546	SLC6A2	2.65559	0.0299237
ENSG00000228727	SAPCD1	2.65478	0.0474809
ENSG00000239470	RP11-16F15.2	2.65218	0.0183166
ENSG00000060982	BCAT1	2.65214	0.00710403
ENSG00000164270	HTR4	2.6484	0.0153532
ENSG00000233476	EEF1A1P6	2.647	0.0102458
ENSG00000198758	EPS8L3	2.64646	0.0311127
ENSG00000238368	snoU13	2.64524	0.0471305
ENSG00000161649	CD300LG	2.64508	0.0362144
ENSG00000237928	RP4-668G5.1	2.63981	0.0482743
ENSG00000165152	TMEM246	2.6395	0.0133684
ENSG00000261424	ATP5F1P7	2.63793	0.0435424
ENSG00000112559	MDFI	2.6359	0.0264521
ENSG00000240087	RP11-254B13.1	2.63477	0.0137336
ENSG00000244363	RPL7P23	2.62973	0.0184711
ENSG00000099139	PCSK5	2.62883	0.0326672
ENSG00000162415	ZSWIM5	2.62838	0.00176947
ENSG00000272562	RP11-396C23.4	2.62691	0.0466941
ENSG00000144285	SCN1A	2.62603	0.0419603
ENSG00000124466	LYPD3	2.62405	0.0372508
ENSG00000201036	SNORD113	2.62305	0.0382845
ENSG00000207646	MIR655	2.62228	0.0458546
ENSG00000182575	NXPH3	2.62054	0.023088
ENSG00000272235	RP11-22L13.1	2.61861	0.0307294
ENSG00000136999	NOV	2.61684	0.0227001
ENSG00000140945	CDH13	2.61628	0.00434323
ENSG00000164379	FOXQ1	2.61551	0.00949333
ENSG00000200612	SNORD114-25	2.61529	0.0423385
ENSG00000225200	AB019441.29	2.61352	0.0114917
ENSG00000203812	HIST2H2AA4	2.61294	0.0208529
ENSG00000273193	RP11-523G9.3	2.61225	0.0372627
ENSG00000181690	PLAG1	2.61026	0.00687556
ENSG00000114646	CSPG5	2.6086	0.0403975
ENSG00000125378	BMP4	2.60844	0.00995884
ENSG00000251896	SNORD116-27	2.60381	0.0358623
ENSG00000261655	CTD-3064M3.3	2.60332	0.0210266
ENSG00000182010	RTKN2	2.60162	0.00836002
ENSG00000213886	UBD	2.60055	0.0316773
ENSG00000236914	RP11-1008C21.2	2.59794	0.0183746
ENSG00000199015	MIR377	2.59349	0.0416551
ENSG00000163519	TRAT1	2.5905	0.0177173
ENSG00000261353	CTA-14H9.5	2.59009	0.0390203
ENSG00000163501	IHH	2.58761	0.0259787
ENSG00000237550	UBE2Q2P6	2.58744	0.0427029
ENSG00000215262	KCNU1	2.58689	0.0404431
ENSG00000256338	RPL41P2	2.58688	0.00926313
ENSG00000261115	TMEM178B	2.58327	0.0259572
ENSG00000241186	TDGF1	2.58081	0.0370731
ENSG00000138795	LEF1	2.58034	0.00728216
ENSG00000138379	MSTN	2.57887	0.0409982
ENSG00000108576	SLC6A4	2.57803	0.0358623
ENSG00000230903	RPL9P8	2.57677	0.0432864
ENSG00000226245	ZNF32-AS1	2.5754	0.0469223
ENSG00000235565	RP11-86H7.7	2.57346	0.0401081
ENSG00000220583	RPL35P2	2.56991	0.00949333
ENSG00000272692	RP11-399K21.14	2.56589	0.0286079
ENSG00000152583	SPARCL1	2.56439	0.00315245
ENSG00000252873	SNORD112	2.5643	0.0298661
ENSG00000246089	RP11-115C21.2	2.55529	0.0026392
ENSG00000228614	RP13-476E20.1	2.55465	0.0482743
ENSG00000162745	OLFML2B	2.5478	0.0107771
ENSG00000171016	PYGO1	2.5464	0.00386056
ENSG00000066382	MPPED2	2.54585	0.0152553
ENSG00000250337	LINC01021	2.54448	0.0472051
ENSG00000165304	MELK	2.54038	0.0158463
ENSG00000270562	RP11-154H23.3	2.53882	0.0445581
ENSG00000242571	RPL21P11	2.53811	0.0311039
ENSG00000214199	EEF1A1P12	2.5373	0.00944754
ENSG00000123500	COL10A1	2.53604	0.0187228
ENSG00000155754	ALS2CR11	2.53303	0.0180888
ENSG00000170629	DPY19L2P2	2.52856	0.00128421
ENSG00000131951	LRRC9	2.52568	0.0246309
ENSG00000181544	FANCB	2.52403	0.0251315
ENSG00000213228	RPL12P38	2.52126	0.0423137
ENSG00000249855	EEF1A1P19	2.51604	0.0111708
ENSG00000252184	RNU2-10P	2.51433	0.0497265
ENSG00000183837	PNMA3	2.51217	0.0224043
ENSG00000184160	ADRA2C	2.506	0.0318229
ENSG00000229091	HSPA8P8	2.50496	0.0118584
ENSG00000235354	CTA-276O3.4	2.50402	0.0174261
ENSG00000200312	RN7SKP255	2.50243	0.0243227
ENSG00000204466	DGKK	2.50173	0.00671648
ENSG00000205208	C4orf46	2.50111	0.00200991
ENSG00000272583	RP11-344P13.6	2.50107	0.0370731
ENSG00000241295	ZBTB20-AS2	2.49951	0.0295908
ENSG00000091409	ITGA6	2.49732	0.000378509
ENSG00000224858	RPL29P11	2.49679	0.00434323
ENSG00000165757	KIAA1462	2.49421	0.0292883
ENSG00000271948	RP11-242F4.2	2.49115	0.00904793
ENSG00000129810	SGOL1	2.49033	0.0362759
ENSG00000237506	RPSAP15	2.48972	0.0195714
ENSG00000205930	C21orf49	2.48806	0.00545885
ENSG00000172687	ZNF738	2.48744	0.000407327
ENSG00000182217	HIST2H4B	2.48388	0.0303832
ENSG00000205572	SERF1B	2.47784	0.0406405
ENSG00000110881	ASIC1	2.46922	0.0308599
ENSG00000164176	EDIL3	2.46769	0.00760518
ENSG00000247925	RP3-510L9.1	2.46103	0.0258164
ENSG00000261534	RP11-244O19.1	2.4537	0.0026392
ENSG00000119888	EPCAM	2.44768	0.0210266
ENSG00000118971	CCND2	2.44228	0.00820411
ENSG00000249846	RP11-77P16.4	2.44147	0.0105181
ENSG00000117477	CCDC181	2.4398	0.0291247
ENSG00000236312	RPL34P34	2.43951	0.0389831
ENSG00000148082	SHC3	2.43484	0.0278999
ENSG00000237697	LINC00312	2.42957	0.0179989
ENSG00000142149	HUNK	2.42897	0.0164306
ENSG00000259070	LINC00639	2.42572	0.0172875
ENSG00000133958	UNC79	2.42468	0.0173574
ENSG00000198780	FAM169A	2.42411	0.00743424
ENSG00000223361	FTH1P10	2.42228	0.0300432
ENSG00000081181	ARG2	2.42066	0.0253047
ENSG00000124491	F13A1	2.41824	0.017836
ENSG00000214534	ZNF705E	2.41058	0.0201671
ENSG00000123570	RAB9B	2.41044	0.0236995
ENSG00000260139	CSPG4P13	2.40839	0.0424433
ENSG00000256393	AC138123.2	2.40537	0.0143205
ENSG00000176222	ZNF404	2.40441	0.0127794
ENSG00000267128	RNF157-AS1	2.39902	0.0483574
ENSG00000213881	NPM1P6	2.39886	0.0321015
ENSG00000244582	RPL21P120	2.3972	0.0353037
ENSG00000164743	C8orf48	2.39687	0.0385945
ENSG00000235904	RBMS3-AS3	2.39667	0.0478362
ENSG00000273026	RP11-422P24.10	2.39342	0.0311039
ENSG00000231369	RP1-40G4P.1	2.39234	0.0497265
ENSG00000214290	COLCA2	2.3877	0.0312004
ENSG00000262089	RP11-589P10.5	2.38628	0.0251326
ENSG00000050165	DKK3	2.38343	0.0161573
ENSG00000168646	AXIN2	2.38013	0.00757605
ENSG00000109674	NEIL3	2.37737	0.0487305
ENSG00000203506	RBMS3-AS2	2.37656	0.0176782
ENSG00000236992	RPL12L3	2.3731	0.00670674
ENSG00000228753	EIF4BP2	2.37298	0.0282798
ENSG00000205414	RP11-401P9.6	2.37159	0.0406405
ENSG00000196549	MME	2.37026	0.024082
ENSG00000251949	SNORD112	2.36863	0.0274488
ENSG00000268175	AC117395.1	2.36674	0.0448843
ENSG00000143603	KCNN3	2.36486	0.0041529
ENSG00000237669	HCG4P3	2.36193	0.0319613
ENSG00000101132	PFDN4	2.35585	0.0370182
ENSG00000136149	RPL13AP25	2.35404	0.0328947
ENSG00000237840	FAM21FP	2.354	0.0324853
ENSG00000240622	RPL7P15	2.35242	0.0323064
ENSG00000169507	SLC38A11	2.35068	0.0311039
ENSG00000214016	RP6-105D16.1	2.34722	0.043966
ENSG00000258733	CTD-2341M24.1	2.34208	0.0273561
ENSG00000259336	RP11-323I15.5	2.33522	0.043549
ENSG00000113319	RASGRF2	2.33382	0.00118159
ENSG00000207721	MIR186	2.32612	0.0442025
ENSG00000230383	AC009245.3	2.32396	0.0432748
ENSG00000138759	FRAS1	2.32275	0.0090375
ENSG00000236762	RP11-159H3.1	2.3216	0.0448843
ENSG00000128045	RASL11B	2.31724	0.0358623
ENSG00000088538	DOCK3	2.31165	0.0208429
ENSG00000213362	FTH1P12	2.31081	0.0419603
ENSG00000180211	RP1-278E11.3	2.30912	0.00746118
ENSG00000205464	ATP6AP1L	2.30901	0.0116248
ENSG00000162981	FAM84A	2.30126	0.0366275
ENSG00000259660	DNM1P47	2.29824	0.0308599
ENSG00000168060	NAALADL1	2.29758	0.0153804
ENSG00000143494	VASH2	2.29243	0.000930265
ENSG00000235217	TSPY26P	2.2894	0.00823876
ENSG00000227615	RP11-864N7.2	2.28915	0.0259886
ENSG00000214595	EML6	2.28796	0.0153226
ENSG00000237991	RPL35P1	2.2879	0.0448843
ENSG00000167554	ZNF610	2.28225	0.00985213
ENSG00000165443	PHYHIPL	2.28186	0.0437742
ENSG00000121621	KIF18A	2.28147	0.0428083
ENSG00000120262	CCDC170	2.28039	0.0246309
ENSG00000091129	NRCAM	2.28033	0.0316773
ENSG00000241494	RP11-796G6.1	2.2803	0.0418593
ENSG00000013297	CLDN11	2.27665	0.0304685
ENSG00000137731	FXYD2	2.27472	0.0303832
ENSG00000228274	RP3-508I15.9	2.27363	0.0455275
ENSG00000226084	RP4-706A16.3	2.27065	0.0357202
ENSG00000053747	LAMA3	2.2688	0.00813265
ENSG00000135414	GDF11	2.26049	0.0083481
ENSG00000113739	STC2	2.25931	0.0467735
ENSG00000183298	RP11-556K13.1	2.25706	0.0386678
ENSG00000141756	FKBP10	2.25082	0.0363923
ENSG00000153982	GDPD1	2.24741	0.0188327
ENSG00000233672	RNASEH2B-AS1	2.24681	0.0240968
ENSG00000206052	DOK6	2.2396	0.0361132
ENSG00000236060	HSPB1P1	2.23613	0.0311039
ENSG00000154096	THY1	2.23459	0.0244228
ENSG00000212664	RP11-592N21.1	2.23294	0.0421337
ENSG00000114120	SLC25A36	2.23148	5.54345e-05
ENSG00000188158	NHS	2.23057	0.0437742
ENSG00000260359	RP11-4F5.2	2.22898	0.0469223
ENSG00000140534	TICRR	2.22367	0.024795
ENSG00000173013	CCDC96	2.22336	0.0478362
ENSG00000164294	GPX8	2.22235	0.0436166
ENSG00000253552	HOXA-AS2	2.22196	0.00813265
ENSG00000182851	GPIHBP1	2.21617	0.00799716
ENSG00000131747	TOP2A	2.21454	0.0291813
ENSG00000170962	PDGFD	2.20717	0.0257216
ENSG00000219451	RPL23P8	2.20517	0.0383918
ENSG00000134602	MST4	2.20271	0.0231002
ENSG00000135919	SERPINE2	2.2008	0.0105181
ENSG00000267339	LINC00906	2.19882	0.0147553
ENSG00000211451	GNRHR2	2.19553	0.0459422
ENSG00000244716	RP11-20O24.4	2.19451	0.0410321
ENSG00000226801	OSTCP8	2.192	0.0460347
ENSG00000182263	FIGN	2.18235	0.0127288
ENSG00000243680	RPL37P23	2.18231	0.0316807
ENSG00000241741	RPL7AP30	2.18151	0.0136531
ENSG00000257027	RP11-705C15.3	2.17404	0.00399912
ENSG00000213036	RP11-365D23.4	2.17023	0.0290738
ENSG00000206190	ATP10A	2.16863	0.0240696
ENSG00000219507	FTH1P8	2.16807	0.0417204
ENSG00000234978	RP11-423O2.5	2.16231	0.0418779
ENSG00000259363	CTD-2054N24.2	2.15487	0.030686
ENSG00000072422	RHOBTB1	2.15474	0.00315245
ENSG00000112984	KIF20A	2.15448	0.048441
ENSG00000200169	RNU5D-1	2.15188	0.0432518
ENSG00000244086	RPS20P35	2.14944	0.0425626
ENSG00000163577	EIF5A2	2.14544	0.0375175
ENSG00000223803	RPS20P14	2.1422	0.0126339
ENSG00000234742	AC144530.1	2.13763	0.0153532
ENSG00000258399	MEG8	2.13449	0.0150757
ENSG00000169783	LINGO1	2.12776	0.0298661
ENSG00000184368	MAP7D2	2.12279	0.023088
ENSG00000243517	RP11-627K11.1	2.12112	0.0476302
ENSG00000270874	RP11-420K10.1	2.11581	0.0225342
ENSG00000226564	FTH1P20	2.11507	0.0277012
ENSG00000272168	CASC15	2.11102	0.0365934
ENSG00000260023	RP11-49C24.1	2.10824	0.0265672
ENSG00000234390	USP27X-AS1	2.10706	0.0460347
ENSG00000225216	AC007362.3	2.10371	0.0379936
ENSG00000110318	KIAA1377	2.10314	0.0273358
ENSG00000146555	SDK1	2.10021	0.0152587
ENSG00000170915	PAQR8	2.09975	0.00143646
ENSG00000169855	ROBO1	2.09699	0.000107165
ENSG00000103599	IQCH	2.09634	0.0321015
ENSG00000261827	RP11-340F14.5	2.09177	0.0374806
ENSG00000137672	TRPC6	2.08954	0.0119813
ENSG00000254535	PABPC4L	2.079	0.0246309
ENSG00000236824	BCYRN1	2.06918	0.029404
ENSG00000143140	GJA5	2.06701	0.0225342
ENSG00000164684	ZNF704	2.06478	0.00166296
ENSG00000229645	LINC00341	2.06408	0.0113738
ENSG00000196227	FAM217B	2.05994	0.000304313
ENSG00000168268	NT5DC2	2.05679	0.0143117
ENSG00000133216	EPHB2	2.05373	0.0159123
ENSG00000169255	B3GALNT1	2.05313	0.044493
ENSG00000197846	HIST1H2BF	2.05093	0.048366
ENSG00000243199	RP11-408P14.1	2.04645	0.0307294
ENSG00000198513	ATL1	2.04288	0.0195605
ENSG00000006468	ETV1	2.04218	0.00356358
ENSG00000259531	RP11-295H24.3	2.03975	0.0470694
ENSG00000234882	EIF3EP1	2.03861	0.01743
ENSG00000271270	TMCC1-AS1	2.03491	0.0405787
ENSG00000270246	SNORD109A	2.03385	0.00268053
ENSG00000120327	PCDHB14	2.02639	0.0127493
ENSG00000064309	CDON	2.02453	0.00799665
ENSG00000115386	REG1A	2.01843	0.0112027
ENSG00000175471	MCTP1	2.01806	0.0198629
ENSG00000234118	RPL13AP6	2.01269	0.0128285
ENSG00000223642	AC008277.1	2.0123	0.0205005
ENSG00000184828	ZBTB7C	2.00992	0.0370731
ENSG00000121089	NACA3P	2.00953	0.0449546
ENSG00000124749	COL21A1	2.00628	0.0267286
ENSG00000146677	AC004453.8	2.0061	0.0481051
ENSG00000006042	TMEM98	2.0041	0.0080677
ENSG00000259612	EEF1A1P22	2.0009	0.0499007
ENSG00000140545	MFGE8	2.00085	0.0067532
ENSG00000261069	SNORD116-20	1.99796	0.00434323
ENSG00000196205	EEF1A1P5	1.99794	0.0167623
ENSG00000151575	TEX9	1.99527	0.0227001
ENSG00000269821	KCNQ1OT1	1.99494	0.0311773
ENSG00000168952	STXBP6	1.99344	0.0127288
ENSG00000225135	RP11-361F15.2	1.99291	0.0148687
ENSG00000254539	RP4-791M13.3	1.99193	0.0410321
ENSG00000243964	RP11-16F15.1	1.99142	0.0490519
ENSG00000224331	AC019181.3	1.98641	0.048366
ENSG00000197121	PGAP1	1.97286	0.00253967
ENSG00000154188	ANGPT1	1.9703	0.0342249
ENSG00000225205	AC093818.1	1.97029	0.00230154
ENSG00000049130	KITLG	1.96334	0.01827
ENSG00000229591	RP5-981O7.2	1.96129	0.0210413
ENSG00000175886	RPL7AP66	1.96082	0.0273358
ENSG00000198300	PEG3	1.96075	0.043549
ENSG00000107242	PIP5K1B	1.95832	0.0264521
ENSG00000184304	PRKD1	1.94829	0.000183617
ENSG00000119608	PROX2	1.94826	0.023088
ENSG00000259953	RP11-4O1.2	1.94643	0.000445397
ENSG00000173451	THAP2	1.94495	0.00688945
ENSG00000176124	DLEU1	1.94303	0.0474252
ENSG00000116117	PARD3B	1.93988	0.000947603
ENSG00000176749	CDK5R1	1.93888	0.0147553
ENSG00000218757	RP3-472M2.2	1.91866	0.0445393
ENSG00000172159	FRMD3	1.91854	0.0214724
ENSG00000136982	DSCC1	1.91784	0.0374806
ENSG00000178665	ZNF713	1.91549	0.00742596
ENSG00000232788	AC078883.3	1.91535	0.0418779
ENSG00000255455	RP11-890B15.3	1.9152	0.014052
ENSG00000116675	DNAJC6	1.91307	0.0445581
ENSG00000134569	LRP4	1.9116	0.00934161
ENSG00000116106	EPHA4	1.9058	0.03373
ENSG00000198182	ZNF607	1.90488	0.0154857
ENSG00000141404	GNAL	1.90154	0.0110355
ENSG00000196911	KPNA5	1.89897	0.000229692
ENSG00000198150	AC135178.1	1.88178	0.0400289
ENSG00000243746	EEF1A1P10	1.87799	0.0456792
ENSG00000152104	PTPN14	1.8738	0.00161621
ENSG00000166845	C18orf54	1.8485	0.0490743
ENSG00000077616	NAALAD2	1.84818	0.0243227
ENSG00000224687	RASAL2-AS1	1.84593	0.0256214
ENSG00000225151	GOLGA2P7	1.84573	0.0243227
ENSG00000267002	RP11-242D8.1	1.84373	0.0178181
ENSG00000213963	AC074286.1	1.8405	0.0110325
ENSG00000142611	PRDM16	1.83891	0.0388949
ENSG00000187607	ZNF286A	1.83297	0.00556082
ENSG00000175329	ISX	1.83189	0.0299237
ENSG00000126947	ARMCX1	1.83016	0.0480266
ENSG00000233913	CTC-575D19.1	1.82944	0.0359142
ENSG00000269001	ZNF818P	1.82927	0.0363592
ENSG00000257151	PWAR6	1.82779	0.00170691
ENSG00000121577	POPDC2	1.82547	0.0369474
ENSG00000165821	SALL2	1.82321	0.0379936
ENSG00000272316	XXbac-BPGBPG55C20.2	1.81904	0.0415656
ENSG00000136866	ZFP37	1.80997	0.00779092
ENSG00000152556	PFKM	1.80951	0.00377232
ENSG00000069849	ATP1B3	1.80638	0.0259572
ENSG00000162437	RAVER2	1.80274	0.0379936
ENSG00000271347	RP11-701H24.7	1.79791	0.0442123
ENSG00000230002	ALMS1-IT1	1.7968	0.0327308
ENSG00000260920	RP1-228H13.5	1.79138	0.0390203
ENSG00000137831	UACA	1.78974	0.0276259
ENSG00000136108	CKAP2	1.78932	0.0240696
ENSG00000156384	SFR1	1.78631	0.0429739
ENSG00000197959	DNM3	1.78451	0.031463
ENSG00000103160	HSDL1	1.78321	0.01159
ENSG00000070061	IKBKAP	1.78053	0.0398728
ENSG00000206621	SNORD116-14	1.78006	0.0342249
ENSG00000184319	RPL23AP82	1.77617	0.0244763
ENSG00000106771	TMEM245	1.77157	0.0244332
ENSG00000213790	OLA1P1	1.76984	0.031629
ENSG00000135218	CD36	1.76958	0.048366
ENSG00000144061	NPHP1	1.76698	0.0317312
ENSG00000171649	ZIK1	1.75767	0.0208529
ENSG00000144792	ZNF660	1.75443	0.0035709
ENSG00000264281	CTD-2031P19.4	1.74972	0.0363433
ENSG00000264885	RP11-815I9.4	1.74682	0.0309282
ENSG00000164124	TMEM144	1.74614	0.00762403
ENSG00000271789	RP5-1112D6.7	1.7433	0.0348789
ENSG00000130300	PLVAP	1.74072	0.0139151
ENSG00000156265	MAP3K7CL	1.73411	0.00949581
ENSG00000183762	KREMEN1	1.72817	0.038167
ENSG00000141576	RNF157	1.71915	0.0309282
ENSG00000146263	MMS22L	1.71589	0.0263531
ENSG00000114670	NEK11	1.71165	0.0144277
ENSG00000188738	FSIP2	1.70732	0.0200947
ENSG00000154864	PIEZO2	1.70536	0.013283
ENSG00000198934	MAGEE1	1.68675	0.0254907
ENSG00000109881	CCDC34	1.68576	0.0449546
ENSG00000171291	ZNF439	1.67349	0.0363923
ENSG00000080298	RFX3	1.67337	0.0026392
ENSG00000254198	RP11-598P20.3	1.6638	0.0153804
ENSG00000215447	BX322557.10	1.66273	0.0219242
ENSG00000158528	PPP1R9A	1.65516	0.0103462
ENSG00000171792	RHNO1	1.64435	0.0122723
ENSG00000181004	BBS12	1.64341	0.0419603
ENSG00000139133	ALG10	1.63275	0.0151589
ENSG00000267152	CTD-2528L19.6	1.6295	0.0158668
ENSG00000108960	MMD	1.62453	0.0483014
ENSG00000109113	RAB34	1.61955	0.0344486
ENSG00000267904	CTC-429P9.5	1.61911	0.048441
ENSG00000071575	TRIB2	1.6151	0.00512678
ENSG00000198185	ZNF334	1.61392	0.032105
ENSG00000110799	VWF	1.61272	0.0495091
ENSG00000236778	INTS6-AS1	1.61124	0.0499007
ENSG00000095002	MSH2	1.61009	0.0167342
ENSG00000143324	XPR1	1.60832	0.00883392
ENSG00000175970	UNC119B	1.60175	0.00383002
ENSG00000214485	RPL7P1	1.58945	0.0349347
ENSG00000260482	CTD-2196E14.9	1.5885	0.000868148
ENSG00000221988	PPT2	1.57733	0.000481623
ENSG00000198960	ARMCX6	1.57333	0.0256147
ENSG00000257815	RP11-611E13.2	1.56798	0.0382845
ENSG00000143515	ATP8B2	1.56461	0.0239533
ENSG00000082458	DLG3	1.54487	0.0246309
ENSG00000122778	KIAA1549	1.54314	0.0327308
ENSG00000271533	RP3-368A4.6	1.53983	0.0316773
ENSG00000187109	NAP1L1	1.53956	0.00104344
ENSG00000111711	GOLT1B	1.5315	0.0237861
ENSG00000158352	SHROOM4	1.52593	0.00917799
ENSG00000188452	CERKL	1.52557	0.0140806
ENSG00000140367	UBE2Q2	1.52293	0.0297105
ENSG00000085276	MECOM	1.52239	0.0026392
ENSG00000187189	TSPYL4	1.5217	0.0103993
ENSG00000140525	FANCI	1.51774	0.0362621
ENSG00000260539	RP11-252A24.7	1.51342	0.0376685
ENSG00000196950	SLC39A10	1.5076	0.0434747
ENSG00000164066	INTU	1.49489	0.023088
ENSG00000168778	TCTN2	1.48346	0.0316773
ENSG00000260917	RP11-57H14.4	1.47658	0.0347486
ENSG00000137269	LRRC1	1.46986	0.0316773
ENSG00000172915	NBEA	1.46984	0.0234303
ENSG00000100077	ADRBK2	1.46008	0.0118584
ENSG00000196247	ZNF107	1.45924	0.00713632
ENSG00000162999	DUSP19	1.4588	0.0319613
ENSG00000131171	SH3BGRL	1.45553	0.0285843
ENSG00000180938	ZNF572	1.45493	0.0458108
ENSG00000182700	IGIP	1.45421	0.0224043
ENSG00000059588	TARBP1	1.44559	0.0342249
ENSG00000236859	NIFK-AS1	1.4394	0.0377968
ENSG00000151692	RNF144A	1.43525	0.0427577
ENSG00000138182	KIF20B	1.43378	0.028452
ENSG00000138801	PAPSS1	1.42766	0.0159165
ENSG00000182963	GJC1	1.42752	0.0483574
ENSG00000102547	CAB39L	1.4249	0.0243227
ENSG00000138735	PDE5A	1.41855	0.0359489
ENSG00000248175	CTC-428G20.3	1.41416	0.0406986
ENSG00000213160	KLHL23	1.41337	0.0372464
ENSG00000105810	CDK6	1.39668	0.0357202
ENSG00000270704	SNORD64	1.39604	0.0432518
ENSG00000153250	RBMS1	1.39587	0.00010333
ENSG00000100271	TTLL1	1.39236	0.0328151
ENSG00000142065	ZFP14	1.39139	0.0362652
ENSG00000196220	SRGAP3	1.39076	0.048123
ENSG00000104219	ZDHHC2	1.38807	0.0159165
ENSG00000109680	TBC1D19	1.38626	0.0199457
ENSG00000147113	CXorf36	1.38558	0.0405064
ENSG00000231025	RP11-175O19.4	1.38419	0.0474809
ENSG00000155893	ACPL2	1.37355	0.0405787
ENSG00000168615	ADAM9	1.36647	0.0154857
ENSG00000257742	RP11-350F4.2	1.36463	0.0080677
ENSG00000151338	MIPOL1	1.36192	0.0281914
ENSG00000223960	AC009948.5	1.3605	0.0404493
ENSG00000269996	RP11-343N15.5	1.35089	0.0471872
ENSG00000164506	STXBP5	1.34107	0.00459041
ENSG00000138686	BBS7	1.33912	0.0245649
ENSG00000197056	ZMYM1	1.33788	0.0424433
ENSG00000145687	SSBP2	1.33328	0.0311039
ENSG00000137502	RAB30	1.33066	0.0321015
ENSG00000255302	EID1	1.32573	0.0355609
ENSG00000094916	CBX5	1.32326	0.0153532
ENSG00000109189	USP46	1.31589	0.0102755
ENSG00000071073	MGAT4A	1.31568	0.0128285
ENSG00000198919	DZIP3	1.30872	0.0319613
ENSG00000113448	PDE4D	1.30337	0.0303832
ENSG00000185222	WBP5	1.29218	0.0427029
ENSG00000271430	RP3-368A4.5	1.27801	0.0363592
ENSG00000155304	HSPA13	1.27717	0.0444815
ENSG00000080839	RBL1	1.26175	0.0256375
ENSG00000225697	SLC26A6	1.26038	0.0490743
ENSG00000125249	RAP2A	1.25138	0.00351747
ENSG00000173598	NUDT4	1.22982	0.0186496
ENSG00000087053	MTMR2	1.22178	0.0404493
ENSG00000143036	SLC44A3	1.21585	0.0404431
ENSG00000101079	NDRG3	1.21341	0.027068
ENSG00000107560	RAB11FIP2	1.21214	0.00736591
ENSG00000259758	CASC7	1.20785	0.030248
ENSG00000116984	MTR	1.2045	0.0208529
ENSG00000147526	TACC1	1.19776	0.031629
ENSG00000153944	MSI2	1.19318	0.0289028
ENSG00000259623	RP11-156E6.1	1.18782	0.00310429
ENSG00000008086	CDKL5	1.18648	0.030686
ENSG00000104765	BNIP3L	1.18561	0.0445581
ENSG00000146757	ZNF92	1.18067	0.00796084
ENSG00000012232	EXTL3	1.17051	0.0358059
ENSG00000171448	ZBTB26	1.16831	0.0130927
ENSG00000152904	GGPS1	1.16678	0.0348789
ENSG00000186130	ZBTB6	1.15925	0.0201663
ENSG00000164284	GRPEL2	1.15133	0.018431
ENSG00000151458	ANKRD50	1.13871	0.043917
ENSG00000153140	CETN3	1.13746	0.0342527
ENSG00000127995	CASD1	1.13444	0.00690851
ENSG00000174695	TMEM167A	1.13369	0.00836002
ENSG00000181827	RFX7	1.12709	0.0363923
ENSG00000106692	FKTN	1.12631	0.00495325
ENSG00000154429	CCSAP	1.11965	0.0117661
ENSG00000166135	HIF1AN	1.11879	0.037539
ENSG00000085365	SCAMP1	1.11728	0.0194478
ENSG00000198105	ZNF248	1.10738	0.0260333
ENSG00000177311	ZBTB38	1.1015	0.0259886
ENSG00000198538	ZNF28	1.10047	0.0321568
ENSG00000184939	ZFP90	1.10023	0.0213732
ENSG00000107779	BMPR1A	1.09386	0.0441353
ENSG00000173275	ZNF449	1.08893	0.000973332
ENSG00000188994	ZNF292	1.08802	0.0463022
ENSG00000139350	NEDD1	1.07609	0.0188327
ENSG00000101871	MID1	1.06985	0.0423268
ENSG00000172795	DCP2	1.06852	0.00390534
ENSG00000094975	SUCO	1.06522	0.0458229
ENSG00000246067	RAB30-AS1	1.05763	0.0483014
ENSG00000070961	ATP2B1	1.05012	0.012935
ENSG00000177565	TBL1XR1	1.04867	0.00832939
ENSG00000168283	BMI1	1.04788	0.0211275
ENSG00000177125	ZBTB34	1.046	0.02946
ENSG00000084693	AGBL5	1.03262	0.0453588
ENSG00000135315	KIAA1009	1.02811	0.048441
ENSG00000092847	2001-08-01	1.0275	0.04708
ENSG00000119314	PTBP3	1.02495	0.0037175
ENSG00000106799	TGFBR1	1.02217	0.0154857
ENSG00000243943	ZNF512	1.02074	0.0161373
ENSG00000139651	ZNF740	1.01899	0.0467983
ENSG00000186908	ZDHHC17	1.01545	0.000314232
ENSG00000113300	CNOT6	1.01432	0.00526154
ENSG00000133114	GPALPP1	1.01136	0.0463929
ENSG00000079950	STX7	1.00722	0.0182786
ENSG00000138468	SENP7	1.00651	0.036706
ENSG00000163539	CLASP2	1.00586	0.0319682
ENSG00000196591	HDAC2	1.00063	0.0281914
ENSG00000197070	ARRDC1	-1.01018	0.0290476
ENSG00000121680	PEX16	-1.01742	0.0128285
ENSG00000187446	CHP1	-1.01938	0.0364312
ENSG00000135766	EGLN1	-1.02393	0.0432518
ENSG00000115042	FAHD2A	-1.02667	0.0243903
ENSG00000185236	RAB11B	-1.03068	0.0259787
ENSG00000143162	CREG1	-1.03216	0.0388008
ENSG00000231259	AC125232.1	-1.06046	0.0467468
ENSG00000185504	C17orf70	-1.06404	0.0326672
ENSG00000171206	TRIM8	-1.0674	0.04739
ENSG00000144791	LIMD1	-1.07328	0.0179989
ENSG00000172936	MYD88	-1.08181	0.00952946
ENSG00000069998	CECR5	-1.0853	0.0160994
ENSG00000142089	IFITM3	-1.08603	0.0417997
ENSG00000041880	PARP3	-1.09052	0.0258164
ENSG00000110092	CCND1	-1.09244	0.0370731
ENSG00000100726	TELO2	-1.09926	0.0443563
ENSG00000067177	PHKA1	-1.11419	0.0256375
ENSG00000197448	GSTK1	-1.1157	0.0363923
ENSG00000102858	MGRN1	-1.12458	0.0363592
ENSG00000154122	ANKH	-1.12838	0.0410321
ENSG00000182087	TMEM259	-1.12904	0.0214981
ENSG00000110719	TCIRG1	-1.13227	0.00757605
ENSG00000178719	GRINA	-1.14192	0.0448843
ENSG00000159335	PTMS	-1.14675	0.0347446
ENSG00000123395	C12orf44	-1.15362	0.0129178
ENSG00000185043	CIB1	-1.15411	0.00820411
ENSG00000142208	AKT1	-1.15547	0.0355609
ENSG00000170638	TRABD	-1.15762	0.0160994
ENSG00000167114	SLC27A4	-1.1601	0.0182087
ENSG00000115286	NDUFS7	-1.16233	0.0254015
ENSG00000139192	TAPBPL	-1.17848	0.0269438
ENSG00000112992	NNT	-1.18342	0.0251261
ENSG00000175866	BAIAP2	-1.18686	0.00757605
ENSG00000197496	SLC2A10	-1.18918	0.0115381
ENSG00000142409	ZNF787	-1.19312	0.0136966
ENSG00000110013	SIAE	-1.19381	0.0432864
ENSG00000157637	SLC38A10	-1.19603	0.00999476
ENSG00000126107	HECTD3	-1.21541	0.0319613
ENSG00000158792	SPATA2L	-1.2158	0.0428083
ENSG00000156381	ANKRD9	-1.21705	0.0402261
ENSG00000172663	TMEM134	-1.21766	0.00434323
ENSG00000074660	SCARF1	-1.22014	0.0374183
ENSG00000101577	LPIN2	-1.22387	0.0307275
ENSG00000204264	PSMB8	-1.22738	0.0490519
ENSG00000124588	NQO2	-1.22978	0.0323064
ENSG00000117480	FAAH	-1.23283	0.0109534
ENSG00000104524	PYCRL	-1.23359	0.0384499
ENSG00000182054	IDH2	-1.23456	0.0380384
ENSG00000072506	HSD17B10	-1.24509	0.0183166
ENSG00000141098	GFOD2	-1.24807	0.0159165
ENSG00000172340	SUCLG2	-1.25436	0.03373
ENSG00000040487	PQLC2	-1.25578	0.020289
ENSG00000228300	C19orf24	-1.25783	0.0335629
ENSG00000128294	TPST2	-1.25868	0.0352954
ENSG00000238000	RP11-274E7.2	-1.26218	0.0405219
ENSG00000122490	PQLC1	-1.26284	0.023113
ENSG00000008311	AASS	-1.26485	0.0427577
ENSG00000163702	IL17RC	-1.26584	0.0134356
ENSG00000131979	GCH1	-1.27129	0.0157097
ENSG00000063245	EPN1	-1.27192	0.0285843
ENSG00000257135	RP11-320M2.1	-1.28762	0.00704787
ENSG00000196576	PLXNB2	-1.28817	0.0445581
ENSG00000175806	MSRA	-1.28854	0.024082
ENSG00000119703	ZC2HC1C	-1.29765	0.0411853
ENSG00000166016	ABTB2	-1.30175	0.0396939
ENSG00000169919	GUSB	-1.30666	0.00012493
ENSG00000124299	PEPD	-1.31747	0.0117507
ENSG00000105518	TMEM205	-1.31913	0.0177173
ENSG00000100897	DCAF11	-1.31968	0.0158363
ENSG00000104325	DECR1	-1.3203	0.0420264
ENSG00000137714	FDX1	-1.32455	0.0396504
ENSG00000039650	PNKP	-1.33685	0.0313287
ENSG00000099377	HSD3B7	-1.33705	0.0311039
ENSG00000174165	ZDHHC24	-1.33908	0.046943
ENSG00000161618	ALDH16A1	-1.33911	0.0244842
ENSG00000186654	PRR5	-1.33946	0.0272269
ENSG00000167397	VKORC1	-1.34035	0.0475431
ENSG00000136877	FPGS	-1.34754	0.0177168
ENSG00000070423	RNF126	-1.3513	0.00424412
ENSG00000088827	SIGLEC1	-1.35203	0.0475431
ENSG00000164897	TMUB1	-1.35954	0.0379936
ENSG00000142002	DPP9	-1.36443	0.00795202
ENSG00000166002	SMCO4	-1.3688	0.0355283
ENSG00000182325	FBXL6	-1.36897	0.0328947
ENSG00000181513	ACBD4	-1.37016	0.0396504
ENSG00000213563	C8orf82	-1.37211	0.0419603
ENSG00000185507	IRF7	-1.37592	0.0366275
ENSG00000149761	NUDT22	-1.37798	0.0363592
ENSG00000139405	RITA1	-1.3815	0.0259859
ENSG00000119125	GDA	-1.38341	0.0456792
ENSG00000006015	C19orf60	-1.39325	0.0358623
ENSG00000166455	C16orf46	-1.4001	0.0336682
ENSG00000099624	ATP5D	-1.40191	0.00756397
ENSG00000177606	JUN	-1.40365	0.048441
ENSG00000133315	MACROD1	-1.40423	0.00226917
ENSG00000177303	CASKIN2	-1.40705	0.012591
ENSG00000178078	STAP2	-1.4088	0.028164
ENSG00000164120	HPGD	-1.41143	0.00253967
ENSG00000105607	GCDH	-1.41229	0.0227254
ENSG00000264278	RP11-162A12.2	-1.41364	0.03373
ENSG00000100242	SUN2	-1.43394	0.0164891
ENSG00000170412	GPRC5C	-1.43615	0.0161789
ENSG00000157379	DHRS1	-1.44005	0.000703295
ENSG00000176485	PLA2G16	-1.44931	0.0229684
ENSG00000237753	AC079922.3	-1.45799	0.0428037
ENSG00000196502	SULT1A1	-1.4585	0.0374183
ENSG00000159921	GNE	-1.46399	0.00619094
ENSG00000072310	SREBF1	-1.46658	0.0326006
ENSG00000173153	ESRRA	-1.47042	0.00010333
ENSG00000099849	RASSF7	-1.47815	0.017891
ENSG00000134864	GGACT	-1.47868	0.0202472
ENSG00000115257	PCSK4	-1.48278	0.0385484
ENSG00000158828	PINK1	-1.48433	0.0149168
ENSG00000085117	CD82	-1.48729	0.00806474
ENSG00000227300	KRT16P2	-1.49506	0.032105
ENSG00000233621	LINC01137	-1.50048	0.0445581
ENSG00000272655	POLR2J4	-1.51637	0.0207119
ENSG00000106384	MOGAT3	-1.51682	0.0183746
ENSG00000157184	CPT2	-1.51736	0.0180232
ENSG00000102890	ELMO3	-1.51844	0.0174261
ENSG00000063241	ISOC2	-1.51928	0.0392309
ENSG00000107872	FBXL15	-1.5206	0.0117507
ENSG00000103876	FAH	-1.52126	0.0127288
ENSG00000107864	CPEB3	-1.52148	0.0253047
ENSG00000213398	LCAT	-1.5227	0.0240968
ENSG00000010030	ETV7	-1.5359	0.01419
ENSG00000073169	SELO	-1.54447	0.0153532
ENSG00000128928	IVD	-1.54822	0.00235453
ENSG00000233223	AC113189.5	-1.55258	0.0200947
ENSG00000166780	C16orf45	-1.55339	0.0316807
ENSG00000102743	SLC25A15	-1.55609	0.0432864
ENSG00000087076	HSD17B14	-1.55639	0.0342249
ENSG00000160932	LY6E	-1.55966	0.0490743
ENSG00000103254	FAM173A	-1.56451	0.0371249
ENSG00000152475	ZNF837	-1.56521	0.0319613
ENSG00000156587	UBE2L6	-1.56913	0.00290187
ENSG00000180346	TIGD2	-1.57003	0.00762403
ENSG00000103260	METRN	-1.57288	0.0194622
ENSG00000081041	CXCL2	-1.57487	0.0225994
ENSG00000130810	PPAN	-1.57615	0.0437742
ENSG00000171703	TCEA2	-1.57697	0.00637598
ENSG00000104825	NFKBIB	-1.57757	0.000940723
ENSG00000129535	NRL	-1.5861	0.0158363
ENSG00000127884	ECHS1	-1.58754	0.0275661
ENSG00000186994	KANK3	-1.60141	0.0419603
ENSG00000123453	SARDH	-1.6053	0.0342249
ENSG00000140564	FURIN	-1.61857	0.00143646
ENSG00000196366	C9orf163	-1.61997	0.0367307
ENSG00000177943	MAMDC4	-1.62735	0.0296533
ENSG00000025708	TYMP	-1.6276	0.0438655
ENSG00000159069	FBXW5	-1.63009	0.000462979
ENSG00000134326	CMPK2	-1.63162	0.0188327
ENSG00000185100	ADSSL1	-1.6371	0.000977134
ENSG00000185189	NRBP2	-1.64687	0.00290187
ENSG00000182326	C1S	-1.649	0.0486857
ENSG00000137700	SLC37A4	-1.6535	0.0274488
ENSG00000114315	HES1	-1.6648	0.0134441
ENSG00000130203	APOE	-1.67744	0.0321015
ENSG00000188747	NOXA1	-1.67988	0.0142376
ENSG00000153443	UBALD1	-1.68517	0.031629
ENSG00000183628	DGCR6	-1.68598	0.0172875
ENSG00000162881	OXER1	-1.6896	0.0390321
ENSG00000109794	FAM149A	-1.69586	0.0180104
ENSG00000177989	ODF3B	-1.69704	0.0193337
ENSG00000162882	HAAO	-1.7013	0.0154857
ENSG00000148357	HMCN2	-1.70858	0.016554
ENSG00000130813	C19orf66	-1.70877	0.0142845
ENSG00000198324	FAM109A	-1.71029	0.00399912
ENSG00000162241	SLC25A45	-1.71254	0.0296533
ENSG00000120833	SOCS2	-1.73339	0.0495091
ENSG00000224051	GLTPD1	-1.73726	0.00543319
ENSG00000166289	PLEKHF1	-1.73958	0.0389831
ENSG00000198355	PIM3	-1.74957	0.0144101
ENSG00000177542	SLC25A22	-1.75002	8.97838e-05
ENSG00000160323	ADAMTS13	-1.75029	0.0402204
ENSG00000205903	ZNF316	-1.75344	0.046638
ENSG00000175482	POLD4	-1.75637	0.00010333
ENSG00000269386	RAB11B-AS1	-1.75983	0.0442025
ENSG00000100003	SEC14L2	-1.76652	0.00637598
ENSG00000115648	MLPH	-1.76958	0.028354
ENSG00000105327	BBC3	-1.77409	0.00781036
ENSG00000147813	NAPRT1	-1.77578	0.00603676
ENSG00000100577	GSTZ1	-1.77995	0.027332
ENSG00000100558	PLEK2	-1.7833	0.0253047
ENSG00000246985	SOCS2-AS1	-1.78567	0.0433684
ENSG00000239445	ST3GAL6-AS1	-1.7966	0.0302196
ENSG00000234949	AC104667.3	-1.81808	0.0482791
ENSG00000229754	CXCR2P1	-1.82539	0.0140081
ENSG00000203485	INF2	-1.82549	0.00710403
ENSG00000254827	SLC22A18AS	-1.82616	0.0108904
ENSG00000188660	LINC00319	-1.82932	0.0365601
ENSG00000239911	PRKAG2-AS1	-1.83057	0.023088
ENSG00000149131	SERPING1	-1.83713	0.0114954
ENSG00000122971	ACADS	-1.84277	0.0139668
ENSG00000133027	PEMT	-1.87265	0.00711596
ENSG00000123454	DBH	-1.87274	0.0136457
ENSG00000213071	LPAL2	-1.87363	0.0326006
ENSG00000257718	RP11-396F22.1	-1.88302	0.0467983
ENSG00000087237	CETP	-1.88483	0.00603676
ENSG00000167705	RILP	-1.88645	0.00418534
ENSG00000271359	RP11-84C13.1	-1.88728	0.0053169
ENSG00000150048	CLEC1A	-1.88895	0.0445581
ENSG00000159403	C1R	-1.88914	0.0350793
ENSG00000115107	STEAP3	-1.89379	0.00710403
ENSG00000169715	MT1E	-1.89643	3.28304e-05
ENSG00000186806	VSIG10L	-1.90239	0.036697
ENSG00000112964	GHR	-1.90428	0.0449546
ENSG00000100889	PCK2	-1.90723	0.0136457
ENSG00000247317	RP11-273G15.2	-1.90837	0.0322617
ENSG00000110046	ATG2A	-1.90953	0.000256996
ENSG00000176974	SHMT1	-1.9141	0.029641
ENSG00000065320	NTN1	-1.92073	0.00836002
ENSG00000169136	ATF5	-1.92301	0.0412933
ENSG00000125148	MT2A	-1.92717	0.048441
ENSG00000171119	NRTN	-1.93062	0.0309506
ENSG00000272449	RP3-395M20.12	-1.93353	0.031629
ENSG00000197165	SULT1A2	-1.95371	0.0244332
ENSG00000229915	AC016999.2	-1.95423	0.0291457
ENSG00000185522	C11orf35	-1.95545	0.0358623
ENSG00000171385	KCND3	-1.95609	0.0475431
ENSG00000273259	RP11-986E7.7	-1.95647	0.0360399
ENSG00000142544	CTU1	-1.97661	0.0259465
ENSG00000182156	ENPP7	-1.98414	0.0319613
ENSG00000185187	SIGIRR	-1.9871	9.40656e-05
ENSG00000169738	DCXR	-1.98843	0.0124735
ENSG00000232860	SMG7-AS1	-1.99078	0.016554
ENSG00000161640	SIGLEC11	-1.991	0.024082
ENSG00000104267	CA2	-1.99128	0.00710403
ENSG00000134470	IL15RA	-1.99162	0.0418593
ENSG00000182704	TSKU	-1.99992	0.031629
ENSG00000062282	DGAT2	-2.00362	0.0342249
ENSG00000148702	HABP2	-2.00624	0.0329508
ENSG00000225556	C2CD4D	-2.00657	0.0246677
ENSG00000006075	CCL3	-2.00685	0.0244526
ENSG00000163239	TDRD10	-2.00872	0.0302513
ENSG00000173156	RHOD	-2.00908	0.00806474
ENSG00000107338	SHB	-2.02913	0.0154857
ENSG00000256262	USP30-AS1	-2.03006	0.0276259
ENSG00000145545	SRD5A1	-2.03007	0.00836002
ENSG00000239857	GET4	-2.03226	0.0170595
ENSG00000172780	RAB43	-2.03341	0.00209902
ENSG00000205683	DPF3	-2.03392	0.0458804
ENSG00000178814	OPLAH	-2.04128	0.000703295
ENSG00000040608	RTN4R	-2.04298	0.0309875
ENSG00000166816	LDHD	-2.05327	0.0254913
ENSG00000076864	RAP1GAP	-2.06073	0.0357528
ENSG00000230882	AC005077.14	-2.06543	0.0490519
ENSG00000144035	NAT8	-2.06863	0.0355609
ENSG00000151364	KCTD14	-2.06904	0.0054575
ENSG00000260156	RP11-394B2.6	-2.07134	0.00537777
ENSG00000158887	MPZ	-2.07332	0.0327308
ENSG00000206384	COL6A6	-2.08001	0.0214724
ENSG00000162840	MT2P1	-2.0842	0.0429754
ENSG00000138678	AGPAT9	-2.08463	0.0474809
ENSG00000197766	CFD	-2.08779	0.0150757
ENSG00000139269	INHBE	-2.09081	0.0467735
ENSG00000260549	MT1L	-2.09083	0.0445393
ENSG00000230333	AC004538.3	-2.09926	0.0383739
ENSG00000108515	ENO3	-2.10275	0.0250896
ENSG00000162551	ALPL	-2.10548	0.0264909
ENSG00000074416	MGLL	-2.10836	0.0202737
ENSG00000104883	PEX11G	-2.12846	0.00127082
ENSG00000167964	RAB26	-2.13016	0.00128421
ENSG00000107282	APBA1	-2.13209	0.00496305
ENSG00000226450	CYP2D8P	-2.14172	0.0205694
ENSG00000017427	IGF1	-2.15012	0.0440014
ENSG00000260213	RP11-303E16.3	-2.15103	0.037804
ENSG00000204653	ASPDH	-2.15904	0.0317312
ENSG00000165215	CLDN3	-2.16164	0.0244763
ENSG00000214274	ANG	-2.1664	0.0319613
ENSG00000123496	IL13RA2	-2.16645	0.0394252
ENSG00000083807	SLC27A5	-2.17098	0.036726
ENSG00000105289	TJP3	-2.17241	0.0457599
ENSG00000170458	CD14	-2.17384	0.0114724
ENSG00000145708	CRHBP	-2.18995	0.0493064
ENSG00000039537	C6	-2.19329	0.0357202
ENSG00000100197	CYP2D6	-2.19631	0.046614
ENSG00000176894	PXMP2	-2.21453	0.0234303
ENSG00000160200	CBS	-2.22244	0.0165927
ENSG00000129214	SHBG	-2.22548	0.0448129
ENSG00000222040	ADRA2B	-2.2324	0.0091039
ENSG00000184232	OAF	-2.24971	0.00431311
ENSG00000263916	RP11-110H1.4	-2.25592	0.0388379
ENSG00000153714	LURAP1L	-2.25703	0.00650321
ENSG00000227242	NBPF13P	-2.26213	0.0333521
ENSG00000112293	GPLD1	-2.26588	0.0259057
ENSG00000179219	LINC00311	-2.27587	0.0289028
ENSG00000224649	AF124730.4	-2.27945	0.0374183
ENSG00000258604	AL161668.5	-2.28064	0.0256352
ENSG00000215915	ATAD3C	-2.28915	0.0197912
ENSG00000205865	FAM99B	-2.29224	0.0428083
ENSG00000197580	BCO2	-2.30799	0.00835605
ENSG00000133488	SEC14L4	-2.31779	0.043904
ENSG00000248144	ADH1C	-2.32454	0.0482743
ENSG00000109956	B3GAT1	-2.32813	0.0363923
ENSG00000223956	RP4-710M16.2	-2.32838	0.0244842
ENSG00000089847	ANKRD24	-2.33224	0.0259859
ENSG00000138079	SLC3A1	-2.34029	0.0331861
ENSG00000167701	GPT	-2.34217	0.00795202
ENSG00000110169	HPX	-2.34628	0.0457361
ENSG00000272933	RP11-47A8.5	-2.34751	0.00230481
ENSG00000130812	ANGPTL6	-2.35288	0.0272269
ENSG00000134042	MRO	-2.36585	0.0234298
ENSG00000164100	NDST3	-2.36847	0.023397
ENSG00000173898	SPTBN2	-2.37624	0.024082
ENSG00000189419	SPATA41	-2.37669	0.00836002
ENSG00000266998	RP11-936I5.1	-2.37676	0.0391346
ENSG00000245017	RP11-181C3.1	-2.38512	0.0246309
ENSG00000228728	RP11-316K19.3	-2.39084	0.0307275
ENSG00000140459	CYP11A1	-2.39686	0.0184235
ENSG00000169692	AGPAT2	-2.39727	0.00804509
ENSG00000213892	CEACAM16	-2.39837	0.00721038
ENSG00000141622	RNF165	-2.40204	0.0202927
ENSG00000221241	SNORD88A	-2.40317	0.0460347
ENSG00000197893	NRAP	-2.41082	0.0176068
ENSG00000167105	TMEM92	-2.41192	0.0372464
ENSG00000111199	TRPV4	-2.42031	0.0020168
ENSG00000266964	FXYD1	-2.42592	0.0299237
ENSG00000185186	LINC00313	-2.42964	0.021451
ENSG00000117472	TSPAN1	-2.43915	0.00101209
ENSG00000167136	ENDOG	-2.45302	0.0352874
ENSG00000189410	SH2D5	-2.45348	0.031463
ENSG00000271429	RPL17P51	-2.46229	0.0219578
ENSG00000263232	ATP5A1P3	-2.46687	0.00146509
ENSG00000211454	AKR7L	-2.46962	0.0294805
ENSG00000213316	LTC4S	-2.47804	0.0445393
ENSG00000231437	RP11-88H9.2	-2.47895	0.0445393
ENSG00000009765	IYD	-2.48273	0.0273561
ENSG00000087258	GNAO1	-2.4902	0.0259886
ENSG00000163959	SLC51A	-2.49526	0.00619423
ENSG00000224511	LINC00365	-2.49559	0.0407995
ENSG00000173227	SYT12	-2.4998	0.0389556
ENSG00000165140	FBP1	-2.50419	0.00450096
ENSG00000166391	MOGAT2	-2.50708	0.0405787
ENSG00000248050	RP11-422N16.3	-2.50777	0.0447918
ENSG00000181830	SLC35C1	-2.51048	0.00702133
ENSG00000110628	SLC22A18	-2.5142	0.000183617
ENSG00000176399	DMRTA1	-2.51431	0.04739
ENSG00000226435	ANKRD18DP	-2.52517	0.0244166
ENSG00000250479	CHCHD10	-2.52552	0.000260276
ENSG00000197444	OGDHL	-2.53547	0.0349311
ENSG00000162897	FCAMR	-2.54044	0.0404493
ENSG00000182566	CLEC4G	-2.55167	0.0445581
ENSG00000246082	NUDT16P1	-2.55209	0.00226917
ENSG00000232451	AC016768.1	-2.55467	0.0273561
ENSG00000261241	RP11-883G14.1	-2.55696	0.0139708
ENSG00000179862	CITED4	-2.56165	0.00105169
ENSG00000139410	SDSL	-2.56447	0.00128421
ENSG00000235949	AC061961.2	-2.56931	0.0363923
ENSG00000229484	RP5-888M10.2	-2.57502	0.0391346
ENSG00000214142	RPL7P60	-2.57784	0.0445581
ENSG00000272327	RP11-1002K11.1	-2.58081	0.0377396
ENSG00000234810	RP11-466L17.1	-2.59321	0.0404493
ENSG00000175175	PPM1E	-2.59724	0.00166296
ENSG00000139914	FITM1	-2.60073	0.00816222
ENSG00000171954	CYP4F22	-2.60345	0.0377396
ENSG00000249948	GBA3	-2.6059	0.0490519
ENSG00000185467	KPNA7	-2.6249	0.0405787
ENSG00000233493	TMEM238	-2.62827	0.000127587
ENSG00000135447	PPP1R1A	-2.62858	0.0269742
ENSG00000109758	HGFAC	-2.63003	0.0180168
ENSG00000125144	MT1G	-2.63687	0.00434323
ENSG00000100033	PRODH	-2.64877	0.0186738
ENSG00000187185	CTD-2600O9.1	-2.64942	0.0282798
ENSG00000160097	FNDC5	-2.65077	0.000862675
ENSG00000248740	RP11-328K4.1	-2.65085	0.021771
ENSG00000135517	MIP	-2.65261	0.005582
ENSG00000213512	GBP7	-2.66253	0.0186379
ENSG00000241360	PDXP	-2.66701	0.0123699
ENSG00000100652	SLC10A1	-2.66744	0.020059
ENSG00000260704	LINC00543	-2.67427	0.0125606
ENSG00000117983	MUC5B	-2.676	0.0198629
ENSG00000241185	RPL21P122	-2.67801	0.0395443
ENSG00000159650	UROC1	-2.68059	0.0374183
ENSG00000161031	PGLYRP2	-2.68413	0.04708
ENSG00000158125	XDH	-2.692	0.0285843
ENSG00000158825	CDA	-2.71728	0.00781036
ENSG00000142748	FCN3	-2.71767	0.0133753
ENSG00000228719	RP5-1119A7.14	-2.73536	0.048441
ENSG00000049319	SRD5A2	-2.748	0.028513
ENSG00000236341	RP5-1103B4.3	-2.75003	0.0194308
ENSG00000230102	RP11-407B7.1	-2.75449	0.00233659
ENSG00000168509	HFE2	-2.75708	0.0175678
ENSG00000263718	RP11-285E9.6	-2.77081	0.0188364
ENSG00000183971	NPW	-2.77139	0.00799716
ENSG00000152760	TCTEX1D1	-2.79611	0.0164891
ENSG00000156885	COX6A2	-2.79646	0.0277572
ENSG00000124713	GNMT	-2.81227	0.0109842
ENSG00000188676	IDO2	-2.82252	0.00434323
ENSG00000206700	RNU6-723P	-2.85961	0.0423221
ENSG00000182902	SLC25A18	-2.86181	0.00190487
ENSG00000258429	PDF	-2.88365	0.0106283
ENSG00000228812	RP11-157P1.5	-2.88535	0.00205564
ENSG00000176919	C8G	-2.88738	0.000667132
ENSG00000205106	CTD-2210P24.4	-2.89008	0.0158363
ENSG00000204583	LRCOL1	-2.90948	0.0167623
ENSG00000229925	AP001043.1	-2.92974	0.0185856
ENSG00000225308	ASS1P11	-2.93077	0.00301148
ENSG00000234035	AP001044.2	-2.93194	0.0269601
ENSG00000237139	RP11-137L10.5	-2.9322	0.0158115
ENSG00000139547	RDH16	-2.9452	0.00799716
ENSG00000101188	NTSR1	-2.96554	0.0110299
ENSG00000180176	TH	-2.96685	0.0213732
ENSG00000156006	NAT2	-2.96832	0.0130506
ENSG00000166823	MESP1	-2.98169	0.00154501
ENSG00000227634	RP11-431K24.3	-2.98171	0.0319613
ENSG00000157168	NRG1	-3.00781	0.0147892
ENSG00000228705	LINC00659	-3.02642	0.0334072
ENSG00000175336	APOF	-3.0321	0.0244763
ENSG00000234647	RP11-503C24.4	-3.03215	0.0389709
ENSG00000156222	SLC28A1	-3.04686	0.00550945
ENSG00000259370	RP11-1069G10.1	-3.05086	0.000860212
ENSG00000251533	LINC00605	-3.05553	0.0190769
ENSG00000197272	IL27	-3.06386	0.00992768
ENSG00000265830	AL592188.7	-3.07079	0.0349347
ENSG00000148377	IDI2	-3.0717	0.0449546
ENSG00000135423	GLS2	-3.07282	0.00128421
ENSG00000205358	MT1H	-3.1065	0.00154501
ENSG00000181656	GPR88	-3.12882	0.00268053
ENSG00000231683	RP1-27K12.2	-3.13157	0.0183746
ENSG00000152254	G6PC2	-3.13546	0.0176782
ENSG00000256528	AP006285.1	-3.15739	0.0054575
ENSG00000174992	ZG16	-3.16858	0.00948
ENSG00000230058	RP11-172E9.2	-3.17413	0.0172523
ENSG00000175003	SLC22A1	-3.18766	0.00704787
ENSG00000269559	AC093677.1	-3.19112	0.0154202
ENSG00000265741	RN7SL406P	-3.19187	0.0322617
ENSG00000168389	MFSD2A	-3.20243	0.00792691
ENSG00000267286	RP11-794M8.2	-3.20521	0.0437742
ENSG00000256847	CCND2P1	-3.22545	0.0123699
ENSG00000262881	RP11-669E14.4	-3.25776	0.0362652
ENSG00000180745	CLRN3	-3.33462	0.00742576
ENSG00000264530	RN7SL25P	-3.34432	0.0243227
ENSG00000245750	RP11-279F6.1	-3.37716	0.000642558
ENSG00000162482	AKR7A3	-3.38386	0.00518833
ENSG00000116882	HAO2	-3.41199	0.00508501
ENSG00000166183	ASPG	-3.41826	0.0136457
ENSG00000058404	CAMK2B	-3.42734	8.7953e-05
ENSG00000256612	CYP2B7P	-3.45939	0.00901301
ENSG00000231440	RP11-467I20.6	-3.47004	0.00816222
ENSG00000011347	SYT7	-3.4743	2.72433e-05
ENSG00000249364	RP11-434D9.1	-3.47895	0.00127848
ENSG00000232724	AC111186.1	-3.53188	0.000391167
ENSG00000150656	CNDP1	-3.55665	0.00290187
ENSG00000151365	THRSP	-3.58368	0.00482675
ENSG00000227117	CTA-85E5.10	-3.58452	1.57477e-05
ENSG00000249173	LINC01093	-3.64016	0.00430122
ENSG00000129965	INS-IGF2	-3.64092	0.0112338
ENSG00000214255	RPS2P6	-3.69582	0.0108904
ENSG00000229964	RP11-135A1.3	-3.75351	0.00952946
ENSG00000172425	TTC36	-3.80867	0.000183617
ENSG00000100012	SEC14L3	-3.84586	0.00154501
ENSG00000235200	RP4-763G1.2	-3.95785	0.000642558
ENSG00000160202	CRYAA	-3.9878	0.000928453
ENSG00000099769	IGFALS	-4.00411	1.13713e-05
ENSG00000106633	GCK	-4.35054	0.0001547
ENSG00000205312	AC022596.2	-4.35291	0.000940723
ENSG00000137875	BCL2L10	-4.57913	0.000593448
ENSG00000176635	HORMAD2	-4.58931	5.8178e-05
ENSG00000183729	NPBWR1	-5.49014	2.72433e-05

## Sheet: Supplementary Table S2
Supplementary Table S3. Differentially expressed genes with exclusive expression in HBL samples.
Gene	log2 fold-change	padj	Gene Info
PAX2	2.93816	0.0244332	Oncogene (ONGene) | Transcription factor expressed during development; acts in proliferation and tissue regeneration in breast, kidney and female reproductive tract stem cells (https://doi.org/10.1158/1940-6207.capr-15-0121-t) | Important for the development of nervous system, eyes, ears, kidney and mammary gland (https://doi.org/10.1016/j.diabres.2019.107792) | Wnt / Hedgehog / Notch pathways; E…
CMA1	3.9656	0.00127848	Peptidase (serin protease); expressed in mast cells (GeneCards) | KEGG hsa04614: Renin-angiotensin system; regulation of blood pressure | Reactome R-HSA-1474228.4: Degradation of the extracellular matrix; R-HSA-2980736.2: Peptide hormone metabolism; R-HSA-1592389.2: Activation of Matrix Metalloproteinases | Expression associated with infiltration of immune markers in gastric cancer (https://doi.o…
PAGE4	2.80185	0.0371089	Member of the G antigen gene family; expressed in fetal and reprodutive tissues such as prostate, testis, uterus, and in related cancers (GeneCards; http://www.ncbi.nlm.nih.gov/pmc/articles/pmc4219281/; https://doi.org/10.1186/s13046-019-1032-3) | GO:0006979: Response to oxidative stress; GO:0032872: Regulation of stress-activated MAPK cascade; GO:0043066: Negative regulation of apoptotic process…
AC105760.3	3.27501	0.0122789	Antisense RNA; ENSG00000124835 (Ensembl) | Uncharacterized LOC93463 (GeneCards)
LECT1	2.83054	0.0365934	Transmembrane protein; growth regulator; positive control of chondrocyte growth and inhibition of angiogenesis (GeneCards) | GO:0001501: Skeletal system development; GO:0001886: Endothelial cell morphogenesis; GO:0006029: Proteoglycan metabolic process | Downregulated in gastric adenocarcinoma (https://doi.org/10.3892/ijo.2015.3081) and chondrosarcoma (https://doi.org/10.1016/s0014-5793(99)01201-…
GCM1	2.96133	0.0279489	Transcription factor (GeneCards) | Human early embryo development (PathCards) | KEGG hsa04928: Parathyroid hormone synthesis, secretion and action | Epigenetic regulator correlated with the histone marks H3K79me2/me3; decreased expression in high-grade serous ovarian cancer (https://doi.org/10.1038/s41467-018-03590-5) | Target of the Wnt/β-catenin signalling pathway (https://doi.org/10.1038/ncomm…
DLX1	3.17692	0.00490405	Transcription factor; regulator of cytokine signaling pathways, such as TGF-β (GeneCards) | DNA damage/telomere stress induced senescence; Regulation of nuclear SMAD2/3 signaling (PathCards) | GO:0000122: Negative regulation of transcription by RNA polymerase II; GO:0007275: Multicellular organism development; GO:0009790: Embryo development | Overexpressed in prostate cancer; related to the Wnt/β…
ATP6V0D2	3.43628	0.00736591	Subunit of an ATPase complex (GeneCards) | KEGG hsa04151: PI3K-Akt signaling pathway; KEGG hsa01100: Metabolic pathways; KEGG hsa05165: Human papillomavirus infection | Reactome R-HSA-168256.7: Immune system | Promotes tumorigenesis in esophagus cancer; related to epithelial-mesenchymal transition (https://doi.org/10.1007/s10388-020-00735-8) | Downregulation in tumor-associated macrophages result…
MAGED4	4.34109	0.000270014	Member of the melanoma-associated antigen family (GeneCards)| Elevated expression levels in esophageal squamous cell carcinoma (https://doi.org/10.21873/anticanres.13807), hepatocellular carcinoma (https://doi.org/10.1002/jso.23440), glioma (https://doi.org/10.7314/apjcp.2014.15.8.3495), among others
LRRC36	3.45263	0.00637598	Member of the leucine-rich repeat superfamily | Other members present increased expression levels in cancer, such as LRRC15 in osteosarcoma (https://doi.org/10.1002/jor.24848)
GABRB1	3.77548	0.0285843	Subunit of a chloride channel (GABA) related to inhubitory synaptic transmission (GeneCards) | Reactome R-HSA-112314.8: Neurotransmitter receptors and postsynaptic signal transmission | KEGG hsa04727: GABAergic synapse; KEGG hsa04080: Neuroactive ligand-receptor interaction | GO:0007165: Signal transduction; GO:0007214: Gamma-aminobutyric acid signaling pathway; GO:0007268: Chemical synaptic tran…
ARMC3	2.75563	0.0423393	Beta-catenin-like protein (GeneCards) | GO:0005515: Protein binding
TMEM130	3.58623	0.023113	Transmembrane protein (GeneCards) | GO 0005515: Protein binding
MYOZ2	3.14475	0.0176068	Sarcomeric protein; involved in calcineurin signaling (GeneCards)| GO:0000122: Negative regulation of transcription by RNA polymerase II; GO:0007519: Skeletal muscle tissue development; GO:0045214: Sarcomere organization | High expression levels reported in gastric cancer (https://doi.org/10.26355/eurrev_201809_15921)
ISX	1.83189	0.0299237	Transcription factor (GeneCards) | Intestine specific; Metabolism of vitamin A (https://doi.org/10.1074/jbc.m707928200; https://doi.org/10.1073/pnas.1714963114) | Increased expression levels in hepatocellular carcinoma (https://doi.org/10.1158/0008-5472.can-12-2795)
LINC00670	3.04232	0.022954	lincRNA (GeneCards)
ANKRD62	3.19493	0.0140806	Member of the group of Ankyrin repeat domain containing proteins (GeneCards) | GO:0005515: Protein binding | Other members are differentially expressed in colorectal cancer (ANKRD12; downregulated; https://doi.org/10.1186/1756-9966-32-35), colon cancer (ANKRD6 ; upregulated; https://doi.org/10.21147/j.issn.1000-9604.2021.01.10) and breast cancer (ANKRD22; upregulated; https://doi.org/10.17305/bjb…
C1orf227	2.87001	0.0318871	SPATA45; Spermatogenesis-associated protein (GeneCards) | Other SPATA proteins are involved in pro-inflammatory TNF receptor signalling in ovarian cancer (https://doi.org/10.1111/cas.13955) and endometrial cancer (https://doi.org/10.1093/carcin/bgaa034)
MIR494	3.4689	0.00647755	Tumor suppressor (TSGene) | KEGG hsa05206: MicroRNAs in cancer | Expression levels upregulated in hepatocellular carcinoma; related to increased cell proliferation, migration and invasion, and decreased apoptosis; increases resistance of cancer cells to the chemotherapeutic agent sorafenib by targeting PTEN; regulates the Pi3K/Akt pathway; (https://doi.org/10.3892/or.2015.4030) | High expression …
KRT39	2.75209	0.0418593	Structural protein (keratin); part of the cytoeskeleton of epithelial cells (GeneCards) | Reactome R-HSA-1266738.7: Developmental biology | KEGG hsa04915: Estrogen signaling pathway | Expressed during hair follicle differentiation (https://doi.org/10.1038/sj.jid.5700734)
PAX9	3.18982	0.0139708	Transcription factor expressed during development (GeneCards) | Wnt/Hedgehog/Notch pathway; Mesodermal commitment pathway (PathCards) | GO:0006357: Regulation of transcription by RNA polymerase II; GO:0007275: Multicellular organism development | Downregulated in alcohol-induced oro-oesophaeal squamous cell carcinoma (https://doi.org/10.1002/path.5041; https://doi.org/10.1002/path.4998) | Coampli…
MIR411	3.00642	0.0243227	GO:0032701: Negative regulation of interleukin-18 production; GO:0035195: Gene silencing by miRNA | Upregulated in hepatocellular carcinoma (https://doi.org/10.1016/j.biopha.2015.01.001), lung cancer (https://doi.org/10.1158/1078-0432.ccr-13-3348, https://doi.org/10.1007/s13277-015-4425-8) and osteosarcoma (https://doi.org/10.1007/s11356-018-1331-9) | Downregulated in gastric cancer (https://doi.…
SNORD114-5	3.50164	0.0061857	snoRNA (GeneCards) | GO:0006396: RNA processing
SNORD114-16	4.16735	0.000592038	snoRNA (GeneCards) | GO:0006396: RNA processing
SNORD113-6	3.67648	0.0035709	snoRNA (GeneCards) | GO:0006396: RNA processing
RNU6-960P	2.81027	0.0392805	RNU6-960 pseudogene (GeneCards)
RN7SKP124	2.80591	0.0296533	RN7SK pseudogene (GeneCards)
RNU6-652P	2.73772	0.0363923	RNU6-652 pseudogene (GeneCards)
MIR299	2.83418	0.0368389	GO:0035195: Gene silencing by miRNA; GO:0035278: miRNA mediated inhibition of translation | Downregulated in gastric cancer (https://doi.org/10.1515/biol-2021-0022), nasopharyngeal carcinoma (https://pubmed.ncbi.nlm.nih.gov/31786874/), oral squamous cell (https://doi.org/10.1177/1533033819874803) and breast cancer (https://doi.org/10.3892/or.2020.7486)
MIR329-2	3.11557	0.0189198	KEGG hsa05010: Alzheimer disease | GO:0035195: Gene silencing by miRNA; GO:0038061: NIK/NF-kappaB signaling; GO:0090051: Negative regulation of cell migration involved in sprouting angiogenesis; GO:1900747: Negative regulation of vascular endothelial growth factor signaling pathway
MIR654	3.44813	0.00762403	GO:0035195: Gene silencing by miRNA | Downregulated in colorectal cancer; possible correlation with the mTOR signaling pathway (https://doi.org/10.3892/ol.2019.10508) and ovarian cancer (https://doi.org/10.2147/cmar.s229013)
AL023913.1	2.69834	0.0486857	lncRNA; ENSG00000286936 (GeneCards)
RPS3P6	3.21239	0.013092	RPS3 pseudogene (GeneCards)
KB-1683C8.1	2.70126	0.0489408	Ribosomal Protein S2 (RPS2) Pseudogene; ENST00000492365 (Ensembl)
RP11-53I6.1	2.94413	0.0272726	lncRNA; ENSG00000263917 (Ensembl)
MIR889	2.88703	0.0329508	Promotes cell proliferation in colorectal cancer (https://doi.org/10.26355/eurrev_201904_17695), non-small cell lung cancer (https://doi.org/10.1016/j.gene.2019.02.077) and esophageal squamous cell carcinomas (https://doi.org/10.1016/j.febslet.2015.03.027)
RP5-828K20.1	3.00631	0.0246677	Processed pseudogene; ENSG00000225170 (Ensembl)
RP11-433O3.1	2.71353	0.048123	Processed pseudogene; ENSG00000225356 (Ensembl)
LINC00475	2.79435	0.0372627	lincRNA (GeneCards) |Upregulated in glioma (https://doi.org/10.1111/jcmm.16100) and gastric cancer (https://doi.org/10.1002/jcla.22692)
AC026150.5	2.80216	0.0374367	No information
AC006037.2	2.79253	0.0318259	TEC; ENSG00000279218 (Ensembl) | Protein-tyrosine kinase (GeneCards) | GO:0002250: Adaptive immune response; GO:0006468: Protein phosphorylation; GO:0007229: I integrin-mediated signaling pathway; GO:0010543: Regulation of platelet activation | Reactome R-HSA-1280215.5: Cytokine signaling in immune system | KEGG hsa04660: T cell receptor signaling pathway
RP11-365D9.1	3.11608	0.0183166	No information
VN1R51P	2.82743	0.0365934	VN1R51 pseudogene (GeneCards)
GLUDP5	2.98327	0.0240696	GLUD1 pseudogene (GeneCards)
LEF1-AS1	3.48024	0.00668804	LEF1 antisense RNA (GeneCards) | Interacts with miRNAs and is involved in the development of colorectal cancer (https://doi.org/10.1016/j.bbrc.2020.03.153), glioblastoma (https://doi.org/10.1016/j.brainres.2020.146781), ovarian cancer (https://doi.org/10.2147/cmar.s227652), retinoblastoma (https://doi.org/10.1111/1440-1681.13263), among others
RP11-187C18.2	3.2704	0.0104494	lincRNA; ENSG00000232116 (Ensembl)
RP11-154D17.1	3.44655	0.00637598	lncRNA; Uncharacterized LOC101927502 (GeneCards)
U91328.2	2.71216	0.0417853	lncRNA; ENSG00000272558 (GeneCards)
RP11-32F11.2	2.93012	0.023948	lincRNA; LINC01231 (GeneCards)
RP4-668G5.1	2.63981	0.0482744	lncRNA; ENSG00000237928; NFIA-AS2 (GeneCards) | Overexpressed in gliomas (https://doi.org/10.1007/s13577-020-00408-9)
RP11-431J24.2	4.3682	0.000256996	Antisense RNA; ENSG00000238178 (Ensembl) | Antisense To MAGEB17 (GeneCards)
RPS27AP1	2.88583	0.0317066	RPS27A pseudogene (GeneCards)
RPL3P3	3.27247	0.0114724	RPL3 pseudogene (GeneCards)
RP5-839B4.8	3.17568	0.012707	lincRNA; ENSG00000243961 (Ensembl)
CTB-73N10.1	2.9472	0.0285843	Uncharacterized LOC105378211 (GeneCards)
RP11-184M15.1	2.75805	0.0437742	lincRNA; ENSG00000248187 (Ensembl)
LINC00616	2.67031	0.00207889	lincRNA (GeneCards) | Targets ABI2, CCDC85C, EMC10, FAM98B, MLYCD, PARVG, RP11-573D15.8, RP3-323A16.1, RPGR, SNX8 (https://doi.org/10.1186/s12958-020-00660-6)
RP13-644M16.5	2.65907	0.0353552	UGT2B11 pseudogene; ENSG00000248763 (GeneCards)
RP11-798M19.3	3.04652	0.0214724	Antisense RNA; ENSG00000272870 (Ensembl)
GYPB	2.74457	0.0445923	GO:0050900: Leukocyte migration | KEGG hsa05144: Malaria | Reactome R-HSA-202733.5: Cell surface interactions at the vascular wall; Reactome R-HSA-109582.2: Hemostasis | Fusion transcript with SAV1 identified in acute myeloid leukemia (https://doi.org/10.3390/cancers11121951) | Upregulated in prostate cancer (https://doi.org/10.3390/ijms17020250)
RP11-436H11.3	3.07845	0.0177168	lncRNA; High expression levels in renal cell carcinoma (https://doi.org/10.1186/s12943-017-0735-3)
RP11-427M20.1	2.86783	0.0327308	lincRNA; ENST00000507844.1 (lncRNome)
RP11-724M22.1	3.05645	0.0193318	lncRNA; ENST00000505408.1 (Ensembl)
RP11-501C14.7	2.96021	0.0259886	CMC1 pseudogene; ENSG00000251550 (Ensembl)
SNORD112	4.12842	0.000723825	snoRNA (GeneCards) | GO:0006396: RNA processing | Downregulated in acute leukemia (https://doi.org/10.1038/leu.2012.111)
SNORD112	3.55384	0.0054575	snoRNA (GeneCards) | GO:0006396: RNA processing | Downregulated in acute leukemia (https://doi.org/10.1038/leu.2012.111)
RP11-150O12.1	3.30743	0.00997903	lincRNA; ENSG00000253161 (Ensembl) | LINC01605 (GeneCards) | Promotes tumor cells proliferation, migration and metastasis and is upregulated in colorectal cancer (https://doi.org/10.26355/eurrev_202102_24837), laryngeal squamous cell carcinoma (https://doi.org/10.26355/eurrev_201912_19677) and bladder cancer (https://doi.org/10.1042/bsr20180562)
RP11-150O12.6	3.03783	0.0210658	lncRNA; ENSG00000253414 (Ensembl) | LINC01605 (GeneCards) | Upregulated in esophageal squamous cell carcinoma (https://doi.org/10.1007/s13277-016-5227-3)
RP11-396O20.1	3.16446	0.0154202	lincRNA; ENSG00000254695 (Ensembl)
ENPP7P8	2.68582	0.0457371	ENPP7 pseudogene (GeneCards)
TRAV1-2	2.89528	0.0319613	T cell receptor (GeneCards) | GO:0002250: Adaptive immune response; GO:0002376: Immune system process
AC005477.1	2.7963	0.0405219	Protein coding; ENSG00000257040 (Ensembl)
RP11-76E16.2	2.76705	0.0406405	IGF2BP2 processed pseudogene; ENSG00000257674 (Ensembl)
RP1-97G4.1	2.69826	0.0486857	lncRNA; ENSG00000257835 (Ensembl)
RP11-18J9.3	2.87336	0.0322549	lncRNA; ENSG00000258178 (Ensembl)
RP11-16B13.1	3.42677	0.00747266	lncRNA; ENSG00000258553 (Ensembl)
RP11-242P2.1	2.76922	0.041673	Antisense RNA; ENSG00000259106 (Ensembl) | Antisense To NRXN3 (GeneCards)
RP11-142G1.2	2.71034	0.0432748	lncRNA; Cancer Susceptibility 22 (CASC22); ENSG00000260887 (Ensembl)
RP11-395N3.1	3.7317	0.00313985	lncRNA; ENSG00000261379 (Ensembl)
AL132709.3	3.75164	0.00286218	snoRNA; ENSG00000201500 (Ensembl)
LINC00906	2.19882	0.0147553	lincRNA (GeneCards)
CTD-2132N18.4	2.94058	0.0240725	Zinc Finger Protein 385C (ZNF385C) (Gene Cards) | Involved in craniofacial development (ossification) (https://doi.org/10.1016/j.ydbio.2015.01.011)
CTC-203F4.2	2.71043	0.0469223	No information
RP11-435O5.4	2.75789	0.0404493	Antisense RNA; ENSG00000271659 (Ensembl) | Antisense To PTCH1 (GeneCards)
SNORD113-5	3.687	0.00355187	snoRNA (GeneCards) | GO:0006396: RNA processing

## Sheet: Supplementary Table S3
Suplementary Table S4. Differentially expressed genes integration and protein-protein interaction network analysis.
Protein ID	Expression Level	Centrality	Cluster	Gene ID	Gene	Annotation
ENSP00000381231	down	C	A	ENSG00000160200	CBS	Cystathionine-beta-synthase
ENSP00000378992	down	C	A	ENSG00000197165	SULT1A2	Sulfotransferase 1A2; Sulfotransferase that utilizes 3'-phospho-5'-adenylyl sulfate (PAPS) as sulfonate donor to catalyze the sulfate conjugation of catecholamines, phenolic drugs and neurotransmitters. Is also responsible for the sulfonation and activation of minoxidil. Mediates the metabolic activation of carcinogenic N-hydroxyarylamines to DNA binding products and could so participate as modul…
ENSP00000378408	down	C	A	ENSG00000167701	GPT	Alanine aminotransferase 1; Catalyzes the reversible transamination between alanine and 2-oxoglutarate to form pyruvate and glutamate. Participates in cellular nitrogen metabolism and also in liver gluconeogenesis starting with precursors transported from skeletal muscles (By similarity); Belongs to the class-I pyridoxal-phosphate-dependent aminotransferase family. Alanine aminotransferase subfam…
ENSP00000373073	down	C	A	ENSG00000159650	UROC1	Urocanate hydratase 1
ENSP00000385080	down	C	A	ENSG00000103876	FAH	Fumarylacetoacetase; Fumarylacetoacetate hydrolase
ENSP00000333019	down	C	A	ENSG00000185100	ADSSL1	Adenylosuccinate synthetase isozyme 1; Component of the purine nucleotide cycle (PNC), which interconverts IMP and AMP to regulate the nucleotide levels in various tissues, and which contributes to glycolysis and ammoniagenesis. Catalyzes the first committed step in the biosynthesis of AMP from IMP
ENSP00000362344	down	C	A	ENSG00000136877	FPGS	Folylpolyglutamate synthase, mitochondrial; Catalyzes conversion of folates to polyglutamate derivatives allowing concentration of folate compounds in the cell and the intracellular retention of these cofactors, which are important substrates for most of the folate-dependent enzymes that are involved in one-carbon transfer reactions involved in purine, pyrimidine and amino acid synthesis. Unsubst…
ENSP00000419045	down	C	A	ENSG00000131979	GCH1	GTP cyclohydrolase 1; Positively regulates nitric oxide synthesis in umbilical vein endothelial cells (HUVECs). May be involved in dopamine synthesis. May modify pain sensitivity and persistence. Isoform GCH-1 is the functional enzyme, the potential function of the enzymatically inactive isoforms remains unknown; Belongs to the GTP cyclohydrolase I family
ENSP00000360541	down	C	A	ENSG00000157184	CPT2	Carnitine O-palmitoyltransferase 2, mitochondrial; Carnitine palmitoyltransferase 2
ENSP00000418397	down	C	A	ENSG00000128928	IVD	Isovaleryl-CoA dehydrogenase, mitochondrial; Acyl-CoA dehydrogenase family
ENSP00000381206	down	C	A	ENSG00000139547	RDH16	Retinol dehydrogenase 16; Oxidoreductase with a preference for NAD. Oxidizes all- trans-retinol and 13-cis-retinol to the corresponding aldehydes. Has higher activity towards CRBP-bound retinol than with free retinol. Oxidizes 3-alpha-hydroxysteroids. Oxidizes androstanediol and androsterone to dihydrotestosterone and androstanedione. Can also catalyze the reverse reaction; Short chain dehydrogen…
ENSP00000360938	down	C	A	ENSG00000123453	SARDH	Sarcosine dehydrogenase, mitochondrial; Sarcosine dehydrogenase; Belongs to the GcvT family
ENSP00000361894	down	C	A	ENSG00000124713	GNMT	Glycine N-methyltransferase; Catalyzes the methylation of glycine by using S- adenosylmethionine (AdoMet) to form N-methylglycine (sarcosine) with the concomitant production of S-adenosylhomocysteine (AdoHcy). Possible crucial role in the regulation of tissue concentration of AdoMet and of metabolism of methionine; Seven-beta-strand methyltransferase motif containing
ENSP00000349577	down	C	A	ENSG00000100033	POX2	Proline dehydrogenase; Converts proline to delta-1-pyrroline-5-carboxylate; Belongs to the proline oxidase family
ENSP00000274192	down	C	A	ENSG00000145545	SRD5A1	3-oxo-5-alpha-steroid 4-dehydrogenase 1; Converts testosterone into 5-alpha-dihydrotestosterone and progesterone or corticosterone into their corresponding 5- alpha-3-oxosteroids. It plays a central role in sexual differentiation and androgen physiology
ENSP00000426083	down	C	A	ENSG00000248144	ADH1C	Alcohol dehydrogenase 1C, gamma polypeptide
ENSP00000331897	down	C	A	ENSG00000182054	IDH2	Isocitrate dehydrogenase [NADP], mitochondrial; Plays a role in intermediary metabolism and energy production. It may tightly associate or interact with the pyruvate dehydrogenase complex; Belongs to the isocitrate and isopropylmalate dehydrogenases family
ENSP00000222214	down	C	A	ENSG00000105607	GCDH	Glutaryl-CoA dehydrogenase, mitochondrial; Catalyzes the oxidative decarboxylation of glutaryl-CoA to crotonyl-CoA and CO(2) in the degradative pathway of L-lysine, L-hydroxylysine, and L-tryptophan metabolism. It uses electron transfer flavoprotein as its electron acceptor. Isoform Short is inactive; Belongs to the acyl-CoA dehydrogenase family
ENSP00000303356	down	C	A	ENSG00000169738	DCXR	L-xylulose reductase; Catalyzes the NADPH-dependent reduction of several pentoses, tetroses, trioses, alpha-dicarbonyl compounds and L- xylulose. Participates in the uronate cycle of glucose metabolism. May play a role in the water absorption and cellular osmoregulation in the proximal renal tubules by producing xylitol, an osmolyte, thereby preventing osmolytic stress from occurring in the renal…
ENSP00000220966	down	C	A	ENSG00000104524	PYCRL	Pyrroline-5-carboxylate reductase 3; Enzyme that catalyzes the last step in proline biosynthesis. Proline is synthesized from either glutamate or ornithine; both are converted to pyrroline-5-carboxylate (P5C), and then to proline via pyrroline-5-carboxylate reductases (PYCRs). PYCRL is exclusively linked to the conversion of ornithine to proline
ENSP00000483507	down	C	A	ENSG00000116882	HAO2	Hydroxyacid oxidase 2; Catalyzes the oxidation of L-alpha-hydroxy acids as well as, more slowly, that of L-alpha-amino acids; Belongs to the FMN-dependent alpha-hydroxy acid dehydrogenase family
ENSP00000377040	down	C	A	ENSG00000008311	AASS	Alpha-aminoadipic semialdehyde synthase, mitochondrial; Bifunctional enzyme that catalyzes the first two steps in lysine degradation. The N-terminal and the C-terminal contain lysine-ketoglutarate reductase and saccharopine dehydrogenase activity, respectively
ENSP00000277517	down	C	A	ENSG00000148377	IDI2	Isopentenyl-diphosphate delta-isomerase 2; Catalyzes the 1,3-allylic rearrangement of the homoallylic substrate isopentenyl (IPP) to its highly electrophilic allylic isomer, dimethylallyl diphosphate (DMAPP)
ENSP00000376776	down	C	A	ENSG00000123454	DBH	Dopamine beta-hydroxylase; Conversion of dopamine to noradrenaline
ENSP00000264663	down	C	A	ENSG00000112992	NNT	NAD(P) transhydrogenase, mitochondrial; The transhydrogenation between NADH and NADP is coupled to respiration and ATP hydrolysis and functions as a proton pump across the membrane. May play a role in reactive oxygen species (ROS) detoxification in the adrenal gland; In the N-terminal section; belongs to the AlaDH/PNT family
ENSP00000294973	down	C	A	ENSG00000162882	HAAO	3-hydroxyanthranilate 3,4-dioxygenase; Catalyzes the oxidative ring opening of 3- hydroxyanthranilate to 2-amino-3-carboxymuconate semialdehyde, which spontaneously cyclizes to quinolinate; Belongs to the 3-HAO family
ENSP00000216780	down	C	A	ENSG00000100889	PCK2	Phosphoenolpyruvate carboxykinase [GTP], mitochondrial; Catalyzes the conversion of oxaloacetate (OAA) to phosphoenolpyruvate (PEP), the rate-limiting step in the metabolic pathway that produces glucose from lactate and other precursors derived from the citric acid cycle; Belongs to the phosphoenolpyruvate carboxykinase [GTP] family
ENSP00000292596	down	C	A	ENSG00000213316	LTC4S	Leukotriene C4 synthase; Catalyzes the conjugation of leukotriene A4 with reduced glutathione to form leukotriene C4
ENSP00000263093	down	C	A	ENSG00000083807	SLC27A5	Bile acyl-CoA synthetase; Acyl-CoA synthetase involved in bile acid metabolism. Proposed to catalyze the first step in the conjugation of C24 bile acids (choloneates) to glycine and taurine before excretion into bile canaliculi by activating them to their CoA thioesters. Seems to activate secondary bile acids entering the liver from the enterohepatic circulation. In vitro, also activates 3-alpha,…
ENSP00000215904	down	C	A	ENSG00000241360	PDXP	Pyridoxal phosphate phosphatase; Protein serine phosphatase that dephosphorylates 'Ser-3' in cofilin and probably also dephosphorylates phospho-serine residues in DSTN. Regulates cofilin-dependent actin cytoskeleton reorganization. Required for normal progress through mitosis and normal cytokinesis. Does not dephosphorylate phospho-threonines in LIMK1. Does not dephosphorylate peptides containing…
ENSP00000450040	down	C	A	ENSG00000166183	ASPG	60 kDa lysophospholipase; Exhibits lysophospholipase, transacylase, PAF acetylhydrolase and asparaginase activities; In the N-terminal section; belongs to the asparaginase 1 family
ENSP00000385790	down	C	A	ENSG00000139410	SDSL	Serine dehydratase-like; Has low serine dehydratase and threonine dehydratase activity
ENSP00000443432	down	C	A	ENSG00000188676	IDO2	Indoleamine 2,3-dioxygenase 2; Catalyzes the first and rate limiting step of the catabolism of the essential amino acid tryptophan along the kynurenine pathway. Involved in immune regulation. May not play a significant role in tryptophan-related tumoral resistance
ENSP00000376807	Up	C	A	ENSG00000015413	DPEP1	Dipeptidase 1; Hydrolyzes a wide range of dipeptides. Implicated in the renal metabolism of glutathione and its conjugates. Converts leukotriene D4 to leukotriene E4; it may play an important role in the regulation of leukotriene activity
ENSP00000261783	Up	C	A	ENSG00000081181	ARG2	Arginase-2, mitochondrial; May play a role in the regulation of extra-urea cycle arginine metabolism and also in down-regulation of nitric oxide synthesis. Extrahepatic arginase functions to regulate L-arginine bioavailability to nitric oxid synthase (NOS). Arginine metabolism is a critical regulator of innate and adaptive immune responses. Seems to be involved in negative regulation of the survi…
ENSP00000443459	Up	C	A	ENSG00000060982	BCAT1	Branched-chain-amino-acid aminotransferase, cytosolic; Catalyzes the first reaction in the catabolism of the essential branched chain amino acids leucine, isoleucine, and valine
ENSP00000414330	Up	C	A	ENSG00000177181	RIMKLA	N-acetylaspartylglutamate synthase A; Catalyzes the synthesis of N-acetyl-L-aspartyl-L- glutamate (NAAG) and N-acetyl-L-aspartyl-L-glutamyl-L-glutamate; Belongs to the RimK family
ENSP00000482841	Up	C	A	ENSG00000143320	CRABP2	Cellular retinoic acid-binding protein 2; Transports retinoic acid to the nucleus. Regulates the access of retinoic acid to the nuclear retinoic acid receptors; Fatty acid binding protein family
ENSP00000456609	Up	C	A	ENSG00000137868	STRA6	Receptor for retinol uptake STRA6; Functions as retinol transporter. Accepts all-trans retinol from the extracellular retinol-binding protein RBP4, facilitates retinol transport across the cell membrane, and then transfers retinol to the cytoplasmic retinol-binding protein RBP1. Retinol uptake is enhanced by LRAT, an enzyme that converts retinol to all-trans retinyl esters, the storage forms of v…
ENSP00000242592	down	B	A	ENSG00000122971	ACADS	Short-chain specific acyl-CoA dehydrogenase, mitochondrial; Introduces a double bond at position 2 in saturated acyl-CoA's of short chain length, i.e. less than 6 carbon atoms; Belongs to the acyl-CoA dehydrogenase family
ENSP00000370571	down	B	A	ENSG00000180176	TH	Tyrosine 3-monooxygenase; Plays an important role in the physiology of adrenergic neurons; Belongs to the biopterin-dependent aromatic amino acid hydroxylase family
ENSP00000168216	down	B	A	ENSG00000072506	HSD17B10	3-hydroxyacyl-CoA dehydrogenase type-2; Mitochondrial dehydrogenase that catalyzes the beta- oxidation at position 17 of androgens and estrogens and has 3- alpha-hydroxysteroid dehydrogenase activity with androsterone. Catalyzes the third step in the beta-oxidation of fatty acids. Carries out oxidative conversions of 7-alpha-OH and 7-beta-OH bile acids. Also exhibits 20-beta- OH and 21-OH dehydro…
ENSP00000357535	down	B	A	ENSG00000127884	ECHS1	Enoyl-CoA hydratase, mitochondrial; Straight-chain enoyl-CoA thioesters from C4 up to at least C16 are processed, although with decreasing catalytic rate. Has high substrate specificity for crotonyl-CoA and moderate specificity for acryloyl-CoA, 3-methylcrotonyl-CoA and methacrylyl-CoA. It is noteworthy that binds tiglyl-CoA, but hydrates only a small amount of this substrate
ENSP00000216465	down	B	A	ENSG00000100577	GSTZ1	Maleylacetoacetate isomerase; Bifunctional enzyme showing minimal glutathione- conjugating activity with ethacrynic acid and 7-chloro-4- nitrobenz-2-oxa-1,3-diazole and maleylacetoacetate isomerase activity. Has also low glutathione peroxidase activity with T- butyl and cumene hydroperoxides. Is able to catalyze the glutathione dependent oxygenation of dichloroacetic acid to glyoxylic acid; Solub…
ENSP00000318868	down	B	A	ENSG00000176974	SHMT1	Serine hydroxymethyltransferase, cytosolic; Interconversion of serine and glycine
ENSP00000310447	down	B	A	ENSG00000135423	GLS2	Glutaminase liver isoform, mitochondrial; Plays an important role in the regulation of glutamine catabolism. Promotes mitochondrial respiration and increases ATP generation in cells by catalyzing the synthesis of glutamate and alpha-ketoglutarate. Increases cellular anti-oxidant function via NADH and glutathione production. May play a role in preventing tumor proliferation; Ankyrin repeat domain …
ENSP00000232217	Up	B	A	ENSG00000114113	RBP2	Retinol-binding protein 2; Intracellular transport of retinol; Belongs to the calycin superfamily. Fatty-acid binding protein (FABP) family
ENSP00000355536	Up	B	A	ENSG00000116984	MTR	Methionine synthase; Catalyzes the transfer of a methyl group from methyl- cobalamin to homocysteine, yielding enzyme-bound cob(I)alamin and methionine. Subsequently, remethylates the cofactor using methyltetrahydrofolate (By similarity); Belongs to the vitamin-B12 dependent methionine synthase family
ENSP00000413064	Up	B	A	ENSG00000185818	NAT8L	N-acetylaspartate synthetase; Plays a role in the regulation of lipogenesis by producing N-acetylaspartate acid (NAA), a brain-specific metabolite. NAA occurs in high concentration in brain and its hydrolysis plays a significant part in the maintenance of intact white matter. Promotes dopamine uptake by regulating TNF-alpha expression. Attenuates methamphetamine-induced inhibition of dopamine upt…
ENSP00000358831	Up	B	A	ENSG00000118402	ELOVL4	Elongation of very long chain fatty acids protein 4; Catalyzes the first and rate-limiting reaction of the four that constitute the long-chain fatty acids elongation cycle. This endoplasmic reticulum-bound enzymatic process, allows the addition of 2 carbons to the chain of long- and very long-chain fatty acids/VLCFAs per cycle. Condensing enzyme that specifically elongates C24:0 and C26:0 acyl-Co…
ENSP00000282841	Up	B	A	ENSG00000152904	GGPS1	Geranylgeranyl pyrophosphate synthase; Catalyzes the trans-addition of the three molecules of IPP onto DMAPP to form geranylgeranyl pyrophosphate, an important precursor of carotenoids and geranylated proteins
ENSP00000364212	down	HB	B	ENSG00000158825	CDA	Cytidine deaminase; This enzyme scavenges exogenous and endogenous cytidine and 2'-deoxycytidine for UMP synthesis
ENSP00000227507	down	HB	B	ENSG00000110092	CCND1	G1/S-specific cyclin-D1; Regulatory component of the cyclin D1-CDK4 (DC) complex that phosphorylates and inhibits members of the retinoblastoma (RB) protein family including RB1 and regulates the cell-cycle during G(1)/S transition. Phosphorylation of RB1 allows dissociation of the transcription factor E2F from the RB/E2F complex and the subsequent transcription of E2F target genes which are resp…
ENSP00000430432	Up	HB	B	ENSG00000196591	HDAC2	Histone deacetylase 2; Responsible for the deacetylation of lysine residues on the N-terminal part of the core histones (H2A, H2B, H3 and H4). Histone deacetylation gives a tag for epigenetic repression and plays an important role in transcriptional regulation, cell cycle progression and developmental events.
ENSP00000256442	Up	HB	B	ENSG00000134057	CCNB1	G2/mitotic-specific cyclin-B1; Essential for the control of the cell cycle at the G2/M (mitosis) transition; Belongs to the cyclin family. Cyclin AB subfamily
ENSP00000362300	Up	HB	B	ENSG00000092847	AGO1	Protein argonaute-1; Required for RNA-mediated gene silencing (RNAi). Binds to short RNAs such as microRNAs (miRNAs) or short interfering RNAs (siRNAs), and represses the translation of mRNAs which are complementary to them. Lacks endonuclease activity and does not appear to cleave target mRNAs. Also required for transcriptional gene silencing (TGS) of promoter regions which are complementary to …
ENSP00000341843	down	C	B	ENSG00000010030	ETV7	Transcription factor ETV7; Transcriptional repressor; binds to the DNA sequence 5'- CCGGAAGT-3'. Isoform A does not seem to have a repressor activity. Isoform C does not seem to have a repressor activity; Belongs to the ETS family
ENSP00000361895	down	C	B	ENSG00000168389	MFSD2A	Sodium-dependent lysophosphatidylcholine symporter 1, which plays an essential role for blood-brain barrier formation and function . Transport of LPC is essential because it constitutes the major mechanism by which docosahexaenoic acid (DHA), an omega-3 fatty acid that is essential for normal brain growth and cognitive function, enters the brain.
ENSP00000330878	down	C	B	ENSG00000185467	KPNA7	Importin subunit alpha-8; Functions in nuclear protein import; Belongs to the importin alpha family
ENSP00000323511	down	C	B	ENSG00000039650	PNKP	Bifunctional polynucleotide phosphatase/kinase; Plays a key role in the repair of DNA damage, functioning as part of both the non-homologous end-joining (NHEJ) and base excision repair (BER) pathways. Through its two catalytic activities, PNK ensures that DNA termini are compatible with extension and ligation by either removing 3'-phosphates from, or by phosphorylating 5'-hydroxyl groups on, the …
ENSP00000379208	Up	C	B	ENSG00000198105	ZNF248	Zinc finger protein 248; May be involved in transcriptional regulation; Zinc fingers C2H2-type
ENSP00000358154	Up	C	B	ENSG00000203811	HIST2H3C	Histone cluster 2 H3 family member c; Core component of nucleosome. Nucleosomes wrap and compact DNA into chromatin, limiting DNA accessibility to the cellular machineries which require DNA as a template. Histones thereby play a central role in transcription regulation, DNA repair, DNA replication and chromosomal stability.
ENSP00000359319	Up	C	B	ENSG00000075891	PAX2	Paired box protein Pax-2; Transcription factor that may have a role in kidney cell differentiation. Has a critical role in the development of the urogenital tract, the eyes, and the CNS; PRD class homeoboxes and pseudogenes
ENSP00000358155	Up	C	B	ENSG00000203812	HIST2H2AA	Histone cluster 2 H2A family member a4; Core component of nucleosome. Nucleosomes wrap and compact DNA into chromatin, limiting DNA accessibility to the cellular machineries which require DNA as a template. Histones thereby play a central role in transcription regulation, DNA repair, DNA replication and chromosomal stability.
ENSP00000365851	Up	C	B	ENSG00000168283	BMI1	Polycomb complex protein BMI-1; Component of a Polycomb group (PcG) multiprotein PRC1- like complex, a complex class required to maintain the transcriptionally repressive state of many genes, including Hox genes, throughout development. PcG PRC1 complex acts via chromatin remodeling and modification of histones; it mediates monoubiquitination of histone H2A 'Lys-119', rendering chromatin heritabl…
ENSP00000265165	Up	C	B	ENSG00000138795	LEF1	Lymphoid enhancer-binding factor 1; Participates in the Wnt signaling pathway. Activates transcription of target genes in the presence of CTNNB1 and EP300. May play a role in hair cell differentiation and follicle morphogenesis. TLE1, TLE2, TLE3 and TLE4 repress transactivation mediated by LEF1 and CTNNB1. Regulates T-cell receptor alpha enhancer function. Binds DNA in a sequence-specific manner.…
ENSP00000362768	Up	C	B	ENSG00000080839	RBL1	Retinoblastoma-like protein 1; Key regulator of entry into cell division. Directly involved in heterochromatin formation by maintaining overall chromatin structure and, in particular, that of constitutive heterochromatin by stabilizing histone methylation. Recruits and targets histone methyltransferases KMT5B and KMT5C, leading to epigenetic transcriptional repression. Controls histone H4 'Lys- 2…
ENSP00000305077	Up	C	B	ENSG00000171291	ZNF439	Zinc finger protein 439; May be involved in transcriptional regulation; Zinc fingers C2H2-type
ENSP00000363081	Up	C	B	ENSG00000107984	DKK1	Dickkopf-related protein 1; Antagonizes canonical Wnt signaling by inhibiting LRP5/6 interaction with Wnt and by forming a ternary complex with the transmembrane protein KREMEN that promotes internalization of LRP5/6. In the adult, Dkks are implicated in bone formation and bone disease, cancer and Alzheimer disease. Inhibits the pro-apoptotic function of KREMEN1 in a Wnt-independent manner
ENSP00000268138	Up	C	B	ENSG00000140534	TICRR	Treslin; Regulator of DNA replication and S/M and G2/M checkpoints. Regulates the triggering of DNA replication initiation via its interaction with TOPBP1 by participating in CDK2-mediated loading of CDC45L onto replication origins. Required for the transition from pre-replication complex (pre-RC) to pre- initiation complex (pre-IC). Required to prevent mitotic entry after treatment with ionizing…
ENSP00000217289	Up	C	B	ENSG00000101311	FERMT1	Fermitin family homolog 1; Involved in cell adhesion. Contributes to integrin activation. When coexpressed with talin, potentiates activation of ITGA2B. Required for normal keratinocyte proliferation. Required for normal polarization of basal keratinocytes in skin, and for normal cell shape. Required for normal adhesion of keratinocytes to fibronectin and laminin, and for normal keratinocyte migr…
ENSP00000460547	Up	C	B	ENSG00000184939	ZFP90	Zinc finger protein 90 homolog; Inhibits the transcriptional repressor activity of REST by inhibiting its binding to DNA, thereby derepressing transcription of REST target genes; Zinc fingers C2H2-type
ENSP00000452552	Up	C	B	ENSG00000136866	ZFP37	Zinc finger protein 37 homolog; May be involved in transcriptional regulation; Belongs to the krueppel C2H2-type zinc-finger protein family
ENSP00000264674	Up	C	B	ENSG00000085276	MECOM	MDS1 and EVI1 complex locus protein EVI1; Functions as a transcriptional regulator binding to DNA sequences in the promoter region of target genes and regulating positively or negatively their expression. Oncogene which plays a role in development, cell proliferation and differentiation. May also play a role in apoptosis through regulation of the JNK and TGF-beta signaling. Involved in hematopoie…
ENSP00000209875	Up	C	B	ENSG00000094916	CBX5	Chromobox protein homolog 5; Component of heterochromatin that recognizes and binds histone H3 tails methylated at 'Lys-9' (H3K9me), leading to epigenetic repression. In contrast, it is excluded from chromatin when 'Tyr-41' of histone H3 is phosphorylated (H3Y41ph). Can interact with lamin-B receptor (LBR). This interaction can contribute to the association of the heterochromatin with the inner n…
ENSP00000428489	Up	C	B	ENSG00000168078	PBK	Lymphokine-activated killer T-cell-originated protein kinase; Phosphorylates MAP kinase p38. Seems to be active only in mitosis. May also play a role in the activation of lymphoid cells. When phosphorylated, forms a complex with TP53, leading to TP53 destabilization and attenuation of G2/M checkpoint during doxorubicin-induced DNA damage; Belongs to the protein kinase superfamily. STE Ser/Thr pro…
ENSP00000232424	down	B	B	ENSG00000114315	HES1	Transcription factor HES-1; Transcriptional repressor of genes that require a bHLH protein for their transcription. May act as a negative regulator of myogenesis by inhibiting the functions of MYOD1 and ASH1. Binds DNA on N-box motifs: 5'-CACNAG-3' with high affinity and on E-box motifs: 5'-CANNTG-3' with low affinity. May play a role in a functional FA core complex response to DNA cross-link dam…
ENSP00000273317	down	B	B	ENSG00000144791	LIMD1	LIM domain-containing protein 1; Adapter or scaffold protein which participates in the assembly of numerous protein complexes and is involved in several cellular processes such as cell fate determination, cytoskeletal organization, repression of gene transcription, cell-cell adhesion, cell differentiation, proliferation and migration. Positively regulates microRNA (miRNA)-mediated gene silencing …
ENSP00000223366	down	B	B	ENSG00000106633	GCK	Glucokinase; Catalyzes the initial step in utilization of glucose by the beta-cell and liver at physiological glucose concentration. Glucokinase has a high Km for glucose, and so it is effective only when glucose is abundant. The role of GCK is to provide G6P for the synthesis of glycogen. Pancreatic glucokinase plays an important role in modulating insulin secretion. Hepatic glucokinase helps to…
ENSP00000373715	Up	B	B	ENSG00000172795	DCP2	m7GpppN-mRNA hydrolase; Decapping metalloenzyme that catalyzes the cleavage of the cap structure on mRNAs. Removes the 7-methyl guanine cap structure from mRNA molecules, yielding a 5'-phosphorylated mRNA fragment and 7m-GDP. Necessary for the degradation of mRNAs, both in normal mRNA turnover and in nonsense-mediated mRNA decay. Plays a role in replication-dependent histone mRNA degradation. Has…
ENSP00000233146	Up	B	B	ENSG00000095002	MSH2	DNA mismatch repair protein Msh2; Component of the post-replicative DNA mismatch repair system (MMR). Forms two different heterodimers: MutS alpha (MSH2- MSH6 heterodimer) and MutS beta (MSH2-MSH3 heterodimer) which binds to DNA mismatches thereby initiating DNA repair. When bound, heterodimers bend the DNA helix and shields approximately 20 base pairs. MutS alpha recognizes single base mismatche…
ENSP00000451828	down	HB	C	ENSG00000142208	AKT1	RAC-alpha serine/threonine-protein kinase; AKT1 is one of 3 closely related serine/threonine- protein kinases (AKT1, AKT2 and AKT3) called the AKT kinase, and which regulate many processes including metabolism, proliferation, cell survival, growth and angiogenesis. This is mediated through serine and/or threonine phosphorylation of a range of downstream substrates. Over 100 substrate candidates h…
ENSP00000380697	down	HB	C	ENSG00000185507	IRF7	Interferon regulatory factor 7; Key transcriptional regulator of type I interferon (IFN)-dependent immune responses and plays a critical role in the innate immune response against DNA and RNA viruses. Regulates the transcription of type I IFN genes (IFN-alpha and IFN-beta) and IFN-stimulated genes (ISG) by binding to an interferon-stimulated response element (ISRE) in their promoters. Can efficie…
ENSP00000364016	down	HB	C	ENSG00000204264	PSMB8	Proteasome subunit beta type-8; The proteasome is a multicatalytic proteinase complex which is characterized by its ability to cleave peptides with Arg, Phe, Tyr, Leu, and Glu adjacent to the leaving group at neutral or slightly basic pH. The proteasome has an ATP-dependent proteolytic activity. This subunit is involved in antigen processing to generate class I binding peptides. Replacement of PS…
ENSP00000399421	Up	HB	C	ENSG00000135218	CD36	Platelet glycoprotein 4; Multifunctional glycoprotein that acts as receptor for a broad range of ligands. Ligands can be of proteinaceous nature like thrombospondin, fibronectin, collagen or amyloid-beta as well as of lipidic nature such as oxidized low-density lipoprotein (oxLDL), anionic phospholipids, long-chain fatty acids and bacterial diacylated lipopeptides. They are generally multivalent …
ENSP00000264870	Up	H	C	ENSG00000124491	F13A1	Coagulation factor XIII A chain; Factor XIII is activated by thrombin and calcium ion to a transglutaminase that catalyzes the formation of gamma-glutamyl- epsilon-lysine cross-links between fibrin chains, thus stabilizing the fibrin clot. Also cross-link alpha-2-plasmin inhibitor, or fibronectin, to the alpha chains of fibrin
ENSP00000382707	down	C	C	ENSG00000142089	IFITM3	Interferon-induced transmembrane protein 3; IFN-induced antiviral protein which disrupts intracellular cholesterol homeostasis. Inhibits the entry of viruses to the host cell cytoplasm by preventing viral fusion with cholesterol depleted endosomes. May inactivate new enveloped viruses which buds out of the infected cell, by letting them go out with a cholesterol depleted membrane.
ENSP00000361004	down	C	C	ENSG00000123496	IL13RA2	Interleukin-13 receptor subunit alpha-2; Binds as a monomer with high affinity to interleukin-13 (IL13), but not to interleukin-4 (IL4); CD molecules
ENSP00000349365	down	C	C	ENSG00000197272	IL27	Interleukin-27 subunit alpha; Associates with EBI3 to form the IL-27 interleukin, a heterodimeric cytokine which functions in innate immunity. IL-27 has pro- and anti-inflammatory properties, that can regulate T- helper cell development, suppress T-cell proliferation, stimulate cytotoxic T-cell activity, induce isotype switching in B-cells, and that has diverse effects on innate immune cells. Amo…
ENSP00000245185	down	C	C	ENSG00000125148	MT2A	Metallothionein-2; Metallothioneins have a high content of cysteine residues that bind various heavy metals; these proteins are transcriptionally regulated by both heavy metals and glucocorticoids; Belongs to the metallothionein superfamily. Type 1 family
ENSP00000483403	down	C	C	ENSG00000112964	GHR	Growth hormone receptor; Receptor for pituitary gland growth hormone involved in regulating postnatal body growth. On ligand binding, couples to the JAK2/STAT5 pathway (By similarity); Belongs to the type I cytokine receptor family. Type 1 subfamily
ENSP00000312678	Up	C	C	ENSG00000101871	MID1	E3 ubiquitin-protein ligase Midline-1; Has E3 ubiquitin ligase activity towards IGBP1, promoting its monoubiquitination, which results in deprotection of the catalytic subunit of protein phosphatase PP2A, and its subsequent degradation by polyubiquitination; Belongs to the TRIM/RBCC family
ENSP00000281834	Up	C	C	ENSG00000117586	TNFSF4	Tumor necrosis factor ligand superfamily member 4; Cytokine that binds to TNFRSF4. Co-stimulates T-cell proliferation and cytokine production; CD molecules
ENSP00000379098	down	B	C	ENSG00000058404	CAMK2B	Calcium/calmodulin-dependent protein kinase type II subunit beta; Calcium/calmodulin-dependent protein kinase that functions autonomously after Ca(2+)/calmodulin-binding and autophosphorylation, and is involved in dendritic spine and synapse formation, neuronal plasticity and regulation of sarcoplasmic reticulum Ca(2+) transport in skeletal muscle. In neurons, plays an essential structural role i…
ENSP00000334051	Up	HB	D	ENSG00000141404	GNAL	Guanine nucleotide-binding protein G(olf) subunit alpha; Guanine nucleotide-binding proteins (G proteins) are involved as modulators or transducers in various transmembrane signaling systems. G(olf) alpha mediates signal transduction within the olfactory neuroepithelium and the basal ganglia. May be involved in some aspect of visual transduction, and in mediating the effect of one or more hormone…
ENSP00000482128	down	C	E	ENSG00000107864	CPEB3	Cytoplasmic polyadenylation element-binding protein 3; Sequence-specific RNA-binding protein which acts as a translational repressor in the basal unstimulated state but, following neuronal stimulation, acts as a translational activator (By similarity). In contrast to CPEB1, does not bind to the cytoplasmic polyadenylation element (CPE), a uridine-rich sequence element within the mRNA 3'-UTR, but …
ENSP00000377024	Up	B	E	ENSG00000113300	CNOT6	CCR4-NOT transcription complex subunit 6; Poly(A) nuclease with 3'-5' RNase activity. Catalytic component of the CCR4-NOT complex which is one of the major cellular mRNA deadenylases and is linked to various cellular processes including bulk mRNA degradation, miRNA-mediated repression, translational repression during translational initiation and general transcription regulation. Additional comple…
ENSP00000481244	down	C	F	ENSG00000266964	FXYD1	Phospholemman; Associates with and regulates the activity of the sodium/potassium-transporting ATPase (NKA) which transports Na(+) out of the cell and K(+) into the cell. Inhibits NKA activity in its unphosphorylated state and stimulates activity when phosphorylated. Reduces glutathionylation of the NKA beta-1 subunit ATP1B1, thus reversing glutathionylation-mediated inhibition of ATP1B1. Contrib…
ENSP00000286371	Up	C	F	ENSG00000069849	ATP1B3	Sodium/potassium-transporting ATPase subunit beta-3; This is the non-catalytic component of the active enzyme, which catalyzes the hydrolysis of ATP coupled with the exchange of Na(+) and K(+) ions across the plasma membrane. The exact function of the beta-3 subunit is not known; ATPase Na+/K+ transporting subunits
ENSP00000354490	Up	C	F	ENSG00000018625	ATP1A2	Sodium/potassium-transporting ATPase subunit alpha-2; This is the catalytic component of the active enzyme, which catalyzes the hydrolysis of ATP coupled with the exchange of sodium and potassium ions across the plasma membrane. This action creates the electrochemical gradient of sodium and potassium, providing the energy for active transport of various nutrients; Belongs to the cation transport …
ENSP00000230036	down	HB	G	ENSG00000112293	GPLD1	Phosphatidylinositol-glycan-specific phospholipase D; This protein hydrolyzes the inositol phosphate linkage in proteins anchored by phosphatidylinositol glycans (GPI-anchor) thus releasing these proteins from the membrane
*H: hub protein; B: bottleneck protein, HB: hub-bottleneck protein.
